# Supplementary material for: Functional diversity of soil macrofauna may contribute to microbial community stabilization under drought stress
Source: Front Microbiol. 2025 Jun 13;16:1597272. doi: 10.3389/fmicb.2025.1597272 (PMC12202550; doi:10.3389/fmicb.2025.1597272)
Supplement: Supplementary file 2 [file Table_1.XLSX]

## Sheet: 1_Mesocoms identifications
1-Mesocomsn identification and treatment characterization
Mesocosm number (M1 to M16)	treatment	Macrofauna Functinal Diversity	Species
M1	Drought	low=Isopoda only	Armadillidium vulgare; Porcellio laevis; Armadillo officinalis
M2	Drought	high=Anecic earthworm;Isopoda; Diplopoda	Scherotheca; Cylindroiulus caerulocinctus; Porcellio laevis
M3	Control	low= Anecic earthworm only	Scherotheca; A. nocturna; L. terrestris
M4	Control	high=Endogeic earthworm;Diplopoda;Isopoda	A. icterica; Ommatoiulus sabulosus; Armadillo officinalis
M5	Drought	high=Anecic; Endogeic earthworm;Isopoda	A. nocturna; A. caliginosa; Armadillidium vulgare
M6	Drought	high=Anecic; Endogeic earthworm;Diplopoda	L. terrestris; A. chlorotica; Glomeris marginata
M7	Control	high=Anecic; Endogeic earthworm;Isopoda	A. nocturna; A. caliginosa; Armadillidium vulgare
M8	Control	low= Diplopoda only	Cylindroiulus caerulocinctus; Ommatoiulus sabulosus; Glomeris marginata
M9	Control	high=Anecic earthworm;Isopoda; Diplopoda	Scherotheca; Cylindroiulus caerulocinctus; Porcellio laevis
M10	Drought	low= Anecic earthworm only	Scherotheca; A. nocturna; L. terrestris
M11	Drought	low= Endogeic earthworm only	A. caliginosa; A. chlorotica; A. icterica
M12	Control	low=Isopoda only	Armadillidium vulgare; Porcellio laevis; Armadillo officinalis
M13	Control	low= Endogeic earthworm only	A. caliginosa; A. chlorotica; A. icterica
M14	Drought	low= Diplopoda only	Cylindroiulus caerulocinctus; Ommatoiulus sabulosus; Glomeris marginata
M15	Drought	high=Endogeic earthworm;Diplopoda;Isopoda	A. icterica; Ommatoiulus sabulosus; Armadillo officinalis
M16	Control	high=Anecic; Endogeic earthworm;Diplopoda	L. terrestris; A. chlorotica; Glomeris marginata

## Sheet: 2_Treatment_condition_Mesocosms
2-Treatment conditions for Mesocosms experiment
Year	Sampling time	Mesocosms Units	Conditions
2019	Pre-drought	Control	Mediterranean summer drought (soil water potential from -0.2 MPa to -1 MPa to define drought).
	(June)	Drought
	Post-drought	Control	Mediterranean summer drought Upon reaching -1 MPa, all mesocosms were rewatered.
	(Sep-Oct)	Drought	Drought duration was extended by 30% in the first two cycles and doubled in the third cycle. Received 23% less water than Control.
2020	Pre-drought	Control	Mediterranean summer drought (soil water potential from -1.5 Mpa to define drought).
	(June)	Drought
	Post-drought	Control	Mediterranean summer drought Upon reaching -1.5 MPa, all mesocosms were rewatered.
	(Oct)	Drought	Extending drought duration by 30% and reducing precipitation input by 30% relative to control.

## Sheet: 3_LMM_abundance_sampling
3-Output of emmeans for relative abundance across each sampling period
Number	Sampling_period	Phylum_mothur	Functional_Diversity	emmean	SE	df	lower,CL	upper,CL	group
1	Control_2020	Acidobacteriota	low	0.146958	0.0121254	352	0.113602	0.180315	a
2	Control_2019	Acidobacteriota	low	0.15149	0.0121254	352	0.118133	0.184846	a
3	Drought_Pre_drought_2019	Acidobacteriota	low	0.113844	0.0121254	352	0.0804876	0.1472	a
4	Control_Pre_drought_2020	Acidobacteriota	low	0.14649	0.0121254	352	0.113133	0.179846	a
5	Drought_2019	Acidobacteriota	low	0.123188	0.0121254	352	0.0898313	0.156544	a
6	Drought_2020	Acidobacteriota	low	0.138031	0.0121254	352	0.104675	0.171387	a
7	Control_Pre_drought_2019	Acidobacteriota	low	0.120406	0.0121254	352	0.0870501	0.153762	a
8	Drought_Pre_drought_2020	Acidobacteriota	low	0.127354	0.0121254	352	0.093998	0.16071	a
9	Drought_Pre_drought_2019	Actinobacteriota	low	0.160052	0.0121254	352	0.126696	0.193408	a
10	Control_Pre_drought_2019	Actinobacteriota	low	0.184687	0.0121254	352	0.151331	0.218044	a
11	Drought_Pre_drought_2020	Actinobacteriota	low	0.153188	0.0121254	352	0.119831	0.186544	a
12	Control_2020	Actinobacteriota	low	0.17375	0.0121254	352	0.140394	0.207106	a
13	Drought_2020	Actinobacteriota	low	0.196042	0.0121254	352	0.162685	0.229398	a
14	Control_2019	Actinobacteriota	low	0.18524	0.0121254	352	0.151883	0.218596	a
15	Drought_2019	Actinobacteriota	low	0.169896	0.0121254	352	0.13654	0.203252	a
16	Control_Pre_drought_2020	Actinobacteriota	low	0.150062	0.0121254	352	0.116706	0.183419	a
17	Drought_Pre_drought_2020	Bacteroidota	low	0.0842188	0.0121254	352	0.0508626	0.117575	a
18	Drought_2020	Bacteroidota	low	0.0762188	0.0121254	352	0.0428626	0.109575	a
19	Control_2020	Bacteroidota	low	0.0821458	0.0121254	352	0.0487896	0.115502	a
20	Control_Pre_drought_2020	Bacteroidota	low	0.0873854	0.0121254	352	0.0540292	0.120742	a
21	Drought_2019	Bacteroidota	low	0.0904792	0.0121254	352	0.057123	0.123835	a
22	Control_Pre_drought_2019	Bacteroidota	low	0.0966146	0.0121254	352	0.0632584	0.129971	a
23	Control_2019	Bacteroidota	low	0.0994375	0.0121254	352	0.0660813	0.132794	a
24	Drought_Pre_drought_2019	Bacteroidota	low	0.110531	0.0121254	352	0.0771751	0.143887	a
25	Drought_2019	Chloroflexi	low	0.333104	0.0121254	352	0.299748	0.36646	ab
26	Control_2019	Chloroflexi	low	0.34126	0.0121254	352	0.307904	0.374617	ab
27	Drought_Pre_drought_2019	Chloroflexi	low	0.232542	0.0121254	352	0.199185	0.265898	c
28	Control_Pre_drought_2019	Chloroflexi	low	0.248094	0.0121254	352	0.214738	0.28145	c
29	Drought_2020	Chloroflexi	low	0.314469	0.0121254	352	0.281113	0.347825	ab
30	Control_2020	Chloroflexi	low	0.350115	0.0121254	352	0.316758	0.383471	a
31	Drought_Pre_drought_2020	Chloroflexi	low	0.229187	0.0121254	352	0.195831	0.262544	c
32	Control_Pre_drought_2020	Chloroflexi	low	0.300125	0.0121254	352	0.266769	0.333481	b
33	Drought_Pre_drought_2020	Crenarchaeota	low	0.0186458	0.0121254	352	-0.0147104	0.052002	a
34	Control_2020	Crenarchaeota	low	0.0245521	0.0121254	352	-0.0088041	0.0579083	a
35	Drought_2020	Crenarchaeota	low	0.0255625	0.0121254	352	-0.00779368	0.0589187	a
36	Control_Pre_drought_2020	Crenarchaeota	low	0.018875	0.0121254	352	-0.0144812	0.0522312	a
37	Drought_2019	Crenarchaeota	low	0.0285521	0.0121254	352	-0.0048041	0.0619083	a
38	Control_Pre_drought_2019	Crenarchaeota	low	0.0317396	0.0121254	352	-0.0016166	0.0650958	a
39	Drought_Pre_drought_2019	Crenarchaeota	low	0.0284896	0.0121254	352	-0.0048666	0.0618458	a
40	Control_2019	Crenarchaeota	low	0.0271875	0.0121254	352	-0.00616868	0.0605437	a
41	Drought_2020	Desulfobacterota	low	0.00998958	0.0121254	352	-0.0233666	0.0433458	a
42	Drought_Pre_drought_2020	Desulfobacterota	low	0.010375	0.0121254	352	-0.0229812	0.0437312	a
43	Control_Pre_drought_2020	Desulfobacterota	low	0.0145521	0.0121254	352	-0.0188041	0.0479083	a
44	Control_2020	Desulfobacterota	low	0.0114063	0.0121254	352	-0.0219499	0.0447624	a
45	Control_2019	Desulfobacterota	low	0.0143438	0.0121254	352	-0.0190124	0.0476999	a
46	Drought_Pre_drought_2019	Desulfobacterota	low	0.0154167	0.0121254	352	-0.0179395	0.0487729	a
47	Drought_2019	Desulfobacterota	low	0.0147917	0.0121254	352	-0.0185645	0.0481479	a
48	Control_Pre_drought_2019	Desulfobacterota	low	0.0155	0.0121254	352	-0.0178562	0.0488562	a
49	Drought_2020	Gemmatimonadota	low	0.0167396	0.0121254	352	-0.0166166	0.0500958	a
50	Drought_Pre_drought_2020	Gemmatimonadota	low	0.0228333	0.0121254	352	-0.0105229	0.0561895	a
51	Control_2020	Gemmatimonadota	low	0.0197917	0.0121254	352	-0.0135645	0.0531479	a
52	Control_Pre_drought_2020	Gemmatimonadota	low	0.026375	0.0121254	352	-0.00698118	0.0597312	a
53	Drought_2019	Gemmatimonadota	low	0.0257917	0.0121254	352	-0.00756452	0.0591479	a
54	Drought_Pre_drought_2019	Gemmatimonadota	low	0.0345313	0.0121254	352	0.00117507	0.0678874	a
55	Control_2019	Gemmatimonadota	low	0.0347604	0.0121254	352	0.00140423	0.0681166	a
56	Control_Pre_drought_2019	Gemmatimonadota	low	0.0352083	0.0121254	352	0.00185215	0.0685645	a
57	Drought_Pre_drought_2020	Myxococcota	low	0.0107083	0.0121254	352	-0.0226479	0.0440645	a
58	Drought_2020	Myxococcota	low	0.0102813	0.0121254	352	-0.0230749	0.0436374	a
59	Drought_2019	Myxococcota	low	0.008	0.0121254	352	-0.0253562	0.0413562	a
60	Control_2019	Myxococcota	low	0.0174583	0.0121254	352	-0.0158979	0.0508145	a
61	Control_2020	Myxococcota	low	0.00910417	0.0121254	352	-0.024252	0.0424604	a
62	Control_Pre_drought_2019	Myxococcota	low	0.0111667	0.0121254	352	-0.0221895	0.0445229	a
63	Control_Pre_drought_2020	Myxococcota	low	0.012875	0.0121254	352	-0.0204812	0.0462312	a
64	Drought_Pre_drought_2019	Myxococcota	low	0.0128646	0.0121254	352	-0.0204916	0.0462208	a
65	Drought_Pre_drought_2020	Planctomycetota	low	0.00557292	0.0121254	352	-0.0277833	0.0389291	a
66	Drought_2020	Planctomycetota	low	0.00182292	0.0121254	352	-0.0315333	0.0351791	a
67	Control_2020	Planctomycetota	low	0.00215625	0.0121254	352	-0.0311999	0.0355124	a
68	Control_Pre_drought_2020	Planctomycetota	low	0.00692708	0.0121254	352	-0.0264291	0.0402833	a
69	Drought_2019	Planctomycetota	low	0.00785417	0.0121254	352	-0.025502	0.0412104	a
70	Control_Pre_drought_2019	Planctomycetota	low	0.0133437	0.0121254	352	-0.0200124	0.0466999	a
71	Control_2019	Planctomycetota	low	0.013625	0.0121254	352	-0.0197312	0.0469812	a
72	Drought_Pre_drought_2019	Planctomycetota	low	0.0151667	0.0121254	352	-0.0181895	0.0485229	a
73	Drought_2019	Proteobacteria	low	0.458583	0.0121254	352	0.425227	0.49194	de
74	Control_2020	Proteobacteria	low	0.47226	0.0121254	352	0.438904	0.505617	de
75	Drought_Pre_drought_2020	Proteobacteria	low	0.507094	0.0121254	352	0.473738	0.54045	cd
76	Control_Pre_drought_2019	Proteobacteria	low	0.57925	0.0121254	352	0.545894	0.612606	ab
77	Drought_2020	Proteobacteria	low	0.444719	0.0121254	352	0.411363	0.478075	e
78	Control_2019	Proteobacteria	low	0.530698	0.0121254	352	0.497342	0.564054	bc
79	Drought_Pre_drought_2019	Proteobacteria	low	0.570302	0.0121254	352	0.536946	0.603658	ab
80	Control_Pre_drought_2020	Proteobacteria	low	0.59974	0.0121254	352	0.566383	0.633096	a
81	Control_2020	Verrucomicrobiota	low	0.0260208	0.0121254	352	-0.00733535	0.059377	a
82	Drought_2019	Verrucomicrobiota	low	0.0272812	0.0121254	352	-0.00607493	0.0606374	a
83	Drought_2020	Verrucomicrobiota	low	0.0174896	0.0121254	352	-0.0158666	0.0508458	a
84	Drought_Pre_drought_2019	Verrucomicrobiota	low	0.0263958	0.0121254	352	-0.00696035	0.059752	a
85	Drought_Pre_drought_2020	Verrucomicrobiota	low	0.0221146	0.0121254	352	-0.0112416	0.0554708	a
86	Control_Pre_drought_2020	Verrucomicrobiota	low	0.0295104	0.0121254	352	-0.00384577	0.0628666	a
87	Control_Pre_drought_2019	Verrucomicrobiota	low	0.0284063	0.0121254	352	-0.00494993	0.0617624	a
88	Control_2019	Verrucomicrobiota	low	0.0326563	0.0121254	352	-0.000699935	0.0660124	a
89	Control_2020	Acidobacteriota	high	0.156406	0.0121254	352	0.12305	0.189762	a
90	Drought_2019	Acidobacteriota	high	0.144896	0.0121254	352	0.11154	0.178252	a
91	Drought_2020	Acidobacteriota	high	0.139771	0.0121254	352	0.106415	0.173127	a
92	Drought_Pre_drought_2019	Acidobacteriota	high	0.134354	0.0121254	352	0.100998	0.16771	a
93	Drought_Pre_drought_2020	Acidobacteriota	high	0.12924	0.0121254	352	0.0958834	0.162596	a
94	Control_Pre_drought_2020	Acidobacteriota	high	0.146219	0.0121254	352	0.112863	0.179575	a
95	Control_Pre_drought_2019	Acidobacteriota	high	0.120583	0.0121254	352	0.0872271	0.15394	a
96	Control_2019	Acidobacteriota	high	0.143229	0.0121254	352	0.109873	0.176585	a
97	Drought_Pre_drought_2020	Actinobacteriota	high	0.187021	0.0121254	352	0.153665	0.220377	a
98	Drought_2019	Actinobacteriota	high	0.208323	0.0121254	352	0.174967	0.241679	a
99	Drought_2020	Actinobacteriota	high	0.203937	0.0121254	352	0.170581	0.237294	a
100	Drought_Pre_drought_2019	Actinobacteriota	high	0.165354	0.0121254	352	0.131998	0.19871	a
101	Control_2020	Actinobacteriota	high	0.186615	0.0121254	352	0.153258	0.219971	a
102	Control_Pre_drought_2019	Actinobacteriota	high	0.171302	0.0121254	352	0.137946	0.204658	a
103	Control_Pre_drought_2020	Actinobacteriota	high	0.185615	0.0121254	352	0.152258	0.218971	a
104	Control_2019	Actinobacteriota	high	0.166146	0.0121254	352	0.13279	0.199502	a
105	Drought_Pre_drought_2020	Bacteroidota	high	0.0762917	0.0121254	352	0.0429355	0.109648	a
106	Drought_2019	Bacteroidota	high	0.0939792	0.0121254	352	0.060623	0.127335	a
107	Drought_2020	Bacteroidota	high	0.0796771	0.0121254	352	0.0463209	0.113033	a
108	Drought_Pre_drought_2019	Bacteroidota	high	0.0978542	0.0121254	352	0.064498	0.13121	a
109	Control_2020	Bacteroidota	high	0.097625	0.0121254	352	0.0642688	0.130981	a
110	Control_Pre_drought_2019	Bacteroidota	high	0.114042	0.0121254	352	0.0806855	0.147398	a
111	Control_Pre_drought_2020	Bacteroidota	high	0.0949063	0.0121254	352	0.0615501	0.128262	a
112	Control_2019	Bacteroidota	high	0.107781	0.0121254	352	0.0744251	0.141137	a
113	Drought_2019	Chloroflexi	high	0.363187	0.0121254	352	0.329831	0.396544	a
114	Control_2019	Chloroflexi	high	0.348594	0.0121254	352	0.315238	0.38195	a
115	Drought_Pre_drought_2019	Chloroflexi	high	0.264365	0.0121254	352	0.231008	0.297721	b
116	Control_Pre_drought_2019	Chloroflexi	high	0.23276	0.0121254	352	0.199404	0.266117	b
117	Drought_2020	Chloroflexi	high	0.361552	0.0121254	352	0.328196	0.394908	a
118	Control_2020	Chloroflexi	high	0.339281	0.0121254	352	0.305925	0.372637	a
119	Drought_Pre_drought_2020	Chloroflexi	high	0.275052	0.0121254	352	0.241696	0.308408	b
120	Control_Pre_drought_2020	Chloroflexi	high	0.23376	0.0121254	352	0.200404	0.267117	b
121	Drought_Pre_drought_2020	Crenarchaeota	high	0.0186667	0.0121254	352	-0.0146895	0.0520229	a
122	Control_2019	Crenarchaeota	high	0.0249375	0.0121254	352	-0.00841868	0.0582937	a
123	Drought_Pre_drought_2019	Crenarchaeota	high	0.0248229	0.0121254	352	-0.00853327	0.0581791	a
124	Control_Pre_drought_2020	Crenarchaeota	high	0.0171042	0.0121254	352	-0.016252	0.0504604	a
125	Drought_2019	Crenarchaeota	high	0.0314271	0.0121254	352	-0.0019291	0.0647833	a
126	Control_Pre_drought_2019	Crenarchaeota	high	0.0278958	0.0121254	352	-0.00546035	0.061252	a
127	Drought_2020	Crenarchaeota	high	0.0255104	0.0121254	352	-0.00784577	0.0588666	a
128	Control_2020	Crenarchaeota	high	0.0225	0.0121254	352	-0.0108562	0.0558562	a
129	Control_Pre_drought_2020	Desulfobacterota	high	0.00989583	0.0121254	352	-0.0234604	0.043252	a
130	Drought_2020	Desulfobacterota	high	0.00873958	0.0121254	352	-0.0246166	0.0420958	a
131	Control_2020	Desulfobacterota	high	0.0110417	0.0121254	352	-0.0223145	0.0443979	a
132	Drought_Pre_drought_2020	Desulfobacterota	high	0.00930208	0.0121254	352	-0.0240541	0.0426583	a
133	Control_Pre_drought_2019	Desulfobacterota	high	0.0125104	0.0121254	352	-0.0208458	0.0458666	a
134	Drought_2019	Desulfobacterota	high	0.0128438	0.0121254	352	-0.0205124	0.0461999	a
135	Control_2019	Desulfobacterota	high	0.0105521	0.0121254	352	-0.0228041	0.0439083	a
136	Drought_Pre_drought_2019	Desulfobacterota	high	0.01425	0.0121254	352	-0.0191062	0.0476062	a
137	Drought_2020	Gemmatimonadota	high	0.0132396	0.0121254	352	-0.0201166	0.0465958	a
138	Drought_Pre_drought_2020	Gemmatimonadota	high	0.017625	0.0121254	352	-0.0157312	0.0509812	a
139	Control_2020	Gemmatimonadota	high	0.0202813	0.0121254	352	-0.0130749	0.0536374	a
140	Control_Pre_drought_2020	Gemmatimonadota	high	0.0265625	0.0121254	352	-0.00679368	0.0599187	a
141	Drought_2019	Gemmatimonadota	high	0.02775	0.0121254	352	-0.00560618	0.0611062	a
142	Drought_Pre_drought_2019	Gemmatimonadota	high	0.0349375	0.0121254	352	0.00158132	0.0682937	a
143	Control_2019	Gemmatimonadota	high	0.0287813	0.0121254	352	-0.00457493	0.0621374	a
144	Control_Pre_drought_2019	Gemmatimonadota	high	0.0363333	0.0121254	352	0.00297715	0.0696895	a
145	Drought_2020	Myxococcota	high	0.00713542	0.0121254	352	-0.0262208	0.0404916	a
146	Drought_2019	Myxococcota	high	0.0116042	0.0121254	352	-0.021752	0.0449604	a
147	Drought_Pre_drought_2020	Myxococcota	high	0.0133542	0.0121254	352	-0.020002	0.0467104	a
148	Drought_Pre_drought_2019	Myxococcota	high	0.0123854	0.0121254	352	-0.0209708	0.0457416	a
149	Control_2020	Myxococcota	high	0.00929167	0.0121254	352	-0.0240645	0.0426479	a
150	Control_2019	Myxococcota	high	0.0113542	0.0121254	352	-0.022002	0.0447104	a
151	Control_Pre_drought_2020	Myxococcota	high	0.0139792	0.0121254	352	-0.019377	0.0473354	a
152	Control_Pre_drought_2019	Myxococcota	high	0.0150208	0.0121254	352	-0.0183354	0.048377	a
153	Drought_2020	Planctomycetota	high	0.00096875	0.0121254	352	-0.0323874	0.0343249	a
154	Control_2020	Planctomycetota	high	0.00148958	0.0121254	352	-0.0318666	0.0348458	a
155	Control_Pre_drought_2020	Planctomycetota	high	0.00565625	0.0121254	352	-0.0276999	0.0390124	a
156	Drought_Pre_drought_2020	Planctomycetota	high	0.00316667	0.0121254	352	-0.0301895	0.0365229	a
157	Control_2019	Planctomycetota	high	0.00889583	0.0121254	352	-0.0244604	0.042252	a
158	Drought_2019	Planctomycetota	high	0.00919792	0.0121254	352	-0.0241583	0.0425541	a
159	Drought_Pre_drought_2019	Planctomycetota	high	0.0146042	0.0121254	352	-0.018752	0.0479604	a
160	Control_Pre_drought_2019	Planctomycetota	high	0.0197292	0.0121254	352	-0.013627	0.0530854	a
161	Control_2019	Proteobacteria	high	0.477333	0.0121254	352	0.443977	0.51069	de
162	Drought_2020	Proteobacteria	high	0.435562	0.0121254	352	0.402206	0.468919	e
163	Control_Pre_drought_2019	Proteobacteria	high	0.547656	0.0121254	352	0.5143	0.581012	bc
164	Control_Pre_drought_2020	Proteobacteria	high	0.589573	0.0121254	352	0.556217	0.622929	ab
165	Drought_2019	Proteobacteria	high	0.476542	0.0121254	352	0.443185	0.509898	de
166	Control_2020	Proteobacteria	high	0.525406	0.0121254	352	0.49205	0.558762	cd
167	Drought_Pre_drought_2020	Proteobacteria	high	0.54701	0.0121254	352	0.513654	0.580367	bc
168	Drought_Pre_drought_2019	Proteobacteria	high	0.598948	0.0121254	352	0.565592	0.632304	a
169	Control_Pre_drought_2020	Verrucomicrobiota	high	0.0240937	0.0121254	352	-0.00926243	0.0574499	a
170	Drought_Pre_drought_2020	Verrucomicrobiota	high	0.0241042	0.0121254	352	-0.00925202	0.0574604	a
171	Control_2020	Verrucomicrobiota	high	0.0185104	0.0121254	352	-0.0148458	0.0518666	a
172	Drought_2020	Verrucomicrobiota	high	0.0157188	0.0121254	352	-0.0176374	0.0490749	a
173	Control_Pre_drought_2019	Verrucomicrobiota	high	0.0275625	0.0121254	352	-0.00579368	0.0609187	a
174	Drought_Pre_drought_2019	Verrucomicrobiota	high	0.0259063	0.0121254	352	-0.00744993	0.0592624	a
175	Control_2019	Verrucomicrobiota	high	0.0287604	0.0121254	352	-0.00459577	0.0621166	a
176	Drought_2019	Verrucomicrobiota	high	0.0299896	0.0121254	352	-0.0033666	0.0633458	a

## Sheet: 4_LMM_abundances_diversity
4-Output of emmeans for relative abundance related to macrofauna functional diverisity
Number	Functional_Diversity	Sampling_period	Phylum_mothur	emmean	SE	df	lower,CL	upper,CL	group
1	high	Control_Pre_drought_2019	Acidobacteriota	0.120583	0.0121254	352	0.0932886	0.147878	a
2	low	Control_Pre_drought_2019	Acidobacteriota	0.120406	0.0121254	352	0.0931115	0.147701	a
3	high	Control_Pre_drought_2019	Acidobacteriota	0.134354	0.0121254	352	0.107059	0.161649	a
4	low	Control_Pre_drought_2019	Acidobacteriota	0.113844	0.0121254	352	0.086549	0.141139	a
5	high	Control_2019	Acidobacteriota	0.143229	0.0121254	352	0.115934	0.170524	a
6	low	Control_2019	Acidobacteriota	0.15149	0.0121254	352	0.124195	0.178784	a
7	high	Drought_2019	Acidobacteriota	0.144896	0.0121254	352	0.117601	0.172191	a
8	low	Drought_2019	Acidobacteriota	0.123188	0.0121254	352	0.0958927	0.150482	a
9	high	Control_Pre_drought_2020	Acidobacteriota	0.146219	0.0121254	352	0.118924	0.173514	a
10	low	Control_Pre_drought_2020	Acidobacteriota	0.14649	0.0121254	352	0.119195	0.173784	a
11	high	Drought_Pre_drought_2020	Acidobacteriota	0.12924	0.0121254	352	0.101945	0.156534	a
12	low	Drought_Pre_drought_2021	Acidobacteriota	0.127354	0.0121254	352	0.100059	0.154649	a
13	high	Control_2020	Acidobacteriota	0.156406	0.0121254	352	0.129111	0.183701	a
14	low	Control_2020	Acidobacteriota	0.146958	0.0121254	352	0.119664	0.174253	a
15	high	Drought_2020	Acidobacteriota	0.139771	0.0121254	352	0.112476	0.167066	a
16	low	Drought_2020	Acidobacteriota	0.138031	0.0121254	352	0.110736	0.165326	a
17	high	Control_Pre_drought_2019	Actinobacteriota	0.171302	0.0121254	352	0.144007	0.198597	a
18	low	Control_Pre_drought_2019	Actinobacteriota	0.184687	0.0121254	352	0.157393	0.211982	a
19	high	Control_Pre_drought_2019	Actinobacteriota	0.165354	0.0121254	352	0.138059	0.192649	a
20	low	Control_Pre_drought_2019	Actinobacteriota	0.160052	0.0121254	352	0.132757	0.187347	a
21	high	Control_2019	Actinobacteriota	0.166146	0.0121254	352	0.138851	0.193441	a
22	low	Control_2019	Actinobacteriota	0.18524	0.0121254	352	0.157945	0.212534	a
23	high	Drought_2019	Actinobacteriota	0.208323	0.0121254	352	0.181028	0.235618	a
24	low	Drought_2019	Actinobacteriota	0.169896	0.0121254	352	0.142601	0.197191	b
25	high	Control_Pre_drought_2020	Actinobacteriota	0.185615	0.0121254	352	0.15832	0.212909	a
26	low	Control_Pre_drought_2020	Actinobacteriota	0.150062	0.0121254	352	0.122768	0.177357	b
27	high	Drought_Pre_drought_2022	Actinobacteriota	0.187021	0.0121254	352	0.159726	0.214316	a
28	low	Drought_Pre_drought_2023	Actinobacteriota	0.153188	0.0121254	352	0.125893	0.180482	b
29	high	Control_2020	Actinobacteriota	0.186615	0.0121254	352	0.15932	0.213909	a
30	low	Control_2020	Actinobacteriota	0.17375	0.0121254	352	0.146455	0.201045	a
31	high	Drought_2020	Actinobacteriota	0.203937	0.0121254	352	0.176643	0.231232	a
32	low	Drought_2020	Actinobacteriota	0.196042	0.0121254	352	0.168747	0.223336	a
33	high	Control_Pre_drought_2019	Bacteroidota	0.114042	0.0121254	352	0.0867469	0.141336	a
34	low	Control_Pre_drought_2019	Bacteroidota	0.0966146	0.0121254	352	0.0693198	0.123909	a
35	high	Control_Pre_drought_2019	Bacteroidota	0.0978542	0.0121254	352	0.0705594	0.125149	a
36	low	Control_Pre_drought_2019	Bacteroidota	0.110531	0.0121254	352	0.0832365	0.137826	a
37	high	Control_2019	Bacteroidota	0.107781	0.0121254	352	0.0804865	0.135076	a
38	low	Control_2019	Bacteroidota	0.0994375	0.0121254	352	0.0721427	0.126732	a
39	high	Drought_2019	Bacteroidota	0.0939792	0.0121254	352	0.0666844	0.121274	a
40	low	Drought_2019	Bacteroidota	0.0904792	0.0121254	352	0.0631844	0.117774	a
41	high	Control_Pre_drought_2020	Bacteroidota	0.0949063	0.0121254	352	0.0676115	0.122201	a
42	low	Control_Pre_drought_2020	Bacteroidota	0.0873854	0.0121254	352	0.0600906	0.11468	a
43	high	Drought_Pre_drought_2025	Bacteroidota	0.0762917	0.0121254	352	0.0489969	0.103586	a
44	low	Drought_Pre_drought_2024	Bacteroidota	0.0842188	0.0121254	352	0.056924	0.111514	a
45	high	Control_2020	Bacteroidota	0.097625	0.0121254	352	0.0703302	0.12492	a
46	low	Control_2020	Bacteroidota	0.0821458	0.0121254	352	0.0548511	0.109441	a
47	high	Drought_2020	Bacteroidota	0.0796771	0.0121254	352	0.0523823	0.106972	a
48	low	Drought_2020	Bacteroidota	0.0762188	0.0121254	352	0.048924	0.103514	a
49	high	Control_Pre_drought_2019	Chloroflexi	0.23276	0.0121254	352	0.205466	0.260055	a
50	low	Control_Pre_drought_2019	Chloroflexi	0.248094	0.0121254	352	0.220799	0.275389	a
51	high	Control_Pre_drought_2019	Chloroflexi	0.264365	0.0121254	352	0.23707	0.291659	a
52	low	Control_Pre_drought_2019	Chloroflexi	0.232542	0.0121254	352	0.205247	0.259836	a
53	high	Control_2019	Chloroflexi	0.348594	0.0121254	352	0.321299	0.375889	a
54	low	Control_2019	Chloroflexi	0.34126	0.0121254	352	0.313966	0.368555	a
55	high	Drought_2019	Chloroflexi	0.363187	0.0121254	352	0.335893	0.390482	a
56	low	Drought_2019	Chloroflexi	0.333104	0.0121254	352	0.305809	0.360399	a
57	high	Control_Pre_drought_2020	Chloroflexi	0.23376	0.0121254	352	0.206466	0.261055	b
58	low	Control_Pre_drought_2020	Chloroflexi	0.300125	0.0121254	352	0.27283	0.32742	a
59	high	Drought_Pre_drought_2026	Chloroflexi	0.275052	0.0121254	352	0.247757	0.302347	a
60	low	Drought_Pre_drought_2027	Chloroflexi	0.229187	0.0121254	352	0.201893	0.256482	b
61	high	Control_2020	Chloroflexi	0.339281	0.0121254	352	0.311986	0.366576	a
62	low	Control_2020	Chloroflexi	0.350115	0.0121254	352	0.32282	0.377409	a
63	high	Drought_2020	Chloroflexi	0.361552	0.0121254	352	0.334257	0.388847	a
64	low	Drought_2020	Chloroflexi	0.314469	0.0121254	352	0.287174	0.341764	b
65	high	Control_Pre_drought_2019	Crenarchaeota	0.0278958	0.0121254	352	0.000601063	0.0551906	a
66	low	Control_Pre_drought_2019	Crenarchaeota	0.0317396	0.0121254	352	0.00444481	0.0590344	a
67	high	Control_Pre_drought_2019	Crenarchaeota	0.0248229	0.0121254	352	-0.00247185	0.0521177	a
68	low	Control_Pre_drought_2019	Crenarchaeota	0.0284896	0.0121254	352	0.00119481	0.0557844	a
69	high	Control_2019	Crenarchaeota	0.0249375	0.0121254	352	-0.00235727	0.0522323	a
70	low	Control_2019	Crenarchaeota	0.0271875	0.0121254	352	-0.000107271	0.0544823	a
71	high	Drought_2019	Crenarchaeota	0.0314271	0.0121254	352	0.00413231	0.0587219	a
72	low	Drought_2019	Crenarchaeota	0.0285521	0.0121254	352	0.00125731	0.0558469	a
73	high	Control_Pre_drought_2020	Crenarchaeota	0.0171042	0.0121254	352	-0.0101906	0.0443989	a
74	low	Control_Pre_drought_2020	Crenarchaeota	0.018875	0.0121254	352	-0.00841977	0.0461698	a
75	high	Drought_Pre_drought_2028	Crenarchaeota	0.0186667	0.0121254	352	-0.0086281	0.0459614	a
76	low	Drought_Pre_drought_2029	Crenarchaeota	0.0186458	0.0121254	352	-0.00864894	0.0459406	a
77	high	Control_2020	Crenarchaeota	0.0225	0.0121254	352	-0.00479477	0.0497948	a
78	low	Control_2020	Crenarchaeota	0.0245521	0.0121254	352	-0.00274269	0.0518469	a
79	high	Drought_2020	Crenarchaeota	0.0255104	0.0121254	352	-0.00178435	0.0528052	a
80	low	Drought_2020	Crenarchaeota	0.0255625	0.0121254	352	-0.00173227	0.0528573	a
81	high	Control_Pre_drought_2019	Desulfobacterota	0.0125104	0.0121254	352	-0.0147844	0.0398052	a
82	low	Control_Pre_drought_2019	Desulfobacterota	0.0155	0.0121254	352	-0.0117948	0.0427948	a
83	high	Control_Pre_drought_2019	Desulfobacterota	0.01425	0.0121254	352	-0.0130448	0.0415448	a
84	low	Control_Pre_drought_2019	Desulfobacterota	0.0154167	0.0121254	352	-0.0118781	0.0427114	a
85	high	Control_2019	Desulfobacterota	0.0105521	0.0121254	352	-0.0167427	0.0378469	a
86	low	Control_2019	Desulfobacterota	0.0143438	0.0121254	352	-0.012951	0.0416385	a
87	high	Drought_2019	Desulfobacterota	0.0128438	0.0121254	352	-0.014451	0.0401385	a
88	low	Drought_2019	Desulfobacterota	0.0147917	0.0121254	352	-0.0125031	0.0420864	a
89	high	Control_Pre_drought_2020	Desulfobacterota	0.00989583	0.0121254	352	-0.0173989	0.0371906	a
90	low	Control_Pre_drought_2020	Desulfobacterota	0.0145521	0.0121254	352	-0.0127427	0.0418469	a
91	high	Drought_Pre_drought_2031	Desulfobacterota	0.00930208	0.0121254	352	-0.0179927	0.0365969	a
92	low	Drought_Pre_drought_2030	Desulfobacterota	0.010375	0.0121254	352	-0.0169198	0.0376698	a
93	high	Control_2020	Desulfobacterota	0.0110417	0.0121254	352	-0.0162531	0.0383364	a
94	low	Control_2020	Desulfobacterota	0.0114063	0.0121254	352	-0.0158885	0.038701	a
95	high	Drought_2020	Desulfobacterota	0.00873958	0.0121254	352	-0.0185552	0.0360344	a
96	low	Drought_2020	Desulfobacterota	0.00998958	0.0121254	352	-0.0173052	0.0372844	a
97	high	Control_Pre_drought_2019	Gemmatimonadota	0.0363333	0.0121254	352	0.00903856	0.0636281	a
98	low	Control_Pre_drought_2019	Gemmatimonadota	0.0352083	0.0121254	352	0.00791356	0.0625031	a
99	high	Control_Pre_drought_2019	Gemmatimonadota	0.0349375	0.0121254	352	0.00764273	0.0622323	a
100	low	Control_Pre_drought_2019	Gemmatimonadota	0.0345313	0.0121254	352	0.00723648	0.061826	a
101	high	Control_2019	Gemmatimonadota	0.0287813	0.0121254	352	0.00148648	0.056076	a
102	low	Control_2019	Gemmatimonadota	0.0347604	0.0121254	352	0.00746565	0.0620552	a
103	high	Drought_2019	Gemmatimonadota	0.02775	0.0121254	352	0.000455229	0.0550448	a
104	low	Drought_2019	Gemmatimonadota	0.0257917	0.0121254	352	-0.0015031	0.0530864	a
105	high	Control_Pre_drought_2020	Gemmatimonadota	0.0265625	0.0121254	352	-0.000732271	0.0538573	a
106	low	Control_Pre_drought_2020	Gemmatimonadota	0.026375	0.0121254	352	-0.000919771	0.0536698	a
107	high	Drought_Pre_drought_2033	Gemmatimonadota	0.017625	0.0121254	352	-0.00966977	0.0449198	a
108	low	Drought_Pre_drought_2032	Gemmatimonadota	0.0228333	0.0121254	352	-0.00446144	0.0501281	a
109	high	Control_2020	Gemmatimonadota	0.0202813	0.0121254	352	-0.00701352	0.047576	a
110	low	Control_2020	Gemmatimonadota	0.0197917	0.0121254	352	-0.0075031	0.0470864	a
111	high	Drought_2020	Gemmatimonadota	0.0132396	0.0121254	352	-0.0140552	0.0405344	a
112	low	Drought_2020	Gemmatimonadota	0.0167396	0.0121254	352	-0.0105552	0.0440344	a
113	high	Control_Pre_drought_2019	Myxococcota	0.0150208	0.0121254	352	-0.0122739	0.0423156	a
114	low	Control_Pre_drought_2019	Myxococcota	0.0111667	0.0121254	352	-0.0161281	0.0384614	a
115	high	Control_Pre_drought_2019	Myxococcota	0.0123854	0.0121254	352	-0.0149094	0.0396802	a
116	low	Control_Pre_drought_2019	Myxococcota	0.0128646	0.0121254	352	-0.0144302	0.0401594	a
117	high	Control_2019	Myxococcota	0.0113542	0.0121254	352	-0.0159406	0.0386489	a
118	low	Control_2019	Myxococcota	0.0174583	0.0121254	352	-0.00983644	0.0447531	a
119	high	Drought_2019	Myxococcota	0.0116042	0.0121254	352	-0.0156906	0.0388989	a
120	low	Drought_2019	Myxococcota	0.008	0.0121254	352	-0.0192948	0.0352948	a
121	high	Control_Pre_drought_2020	Myxococcota	0.0139792	0.0121254	352	-0.0133156	0.0412739	a
122	low	Control_Pre_drought_2020	Myxococcota	0.012875	0.0121254	352	-0.0144198	0.0401698	a
123	high	Drought_Pre_drought_2034	Myxococcota	0.0133542	0.0121254	352	-0.0139406	0.0406489	a
124	low	Drought_Pre_drought_2035	Myxococcota	0.0107083	0.0121254	352	-0.0165864	0.0380031	a
125	high	Control_2020	Myxococcota	0.00929167	0.0121254	352	-0.0180031	0.0365864	a
126	low	Control_2020	Myxococcota	0.00910417	0.0121254	352	-0.0181906	0.0363989	a
127	high	Drought_2020	Myxococcota	0.00713542	0.0121254	352	-0.0201594	0.0344302	a
128	low	Drought_2020	Myxococcota	0.0102813	0.0121254	352	-0.0170135	0.037576	a
129	high	Control_Pre_drought_2019	Planctomycetota	0.0197292	0.0121254	352	-0.0075656	0.0470239	a
130	low	Control_Pre_drought_2019	Planctomycetota	0.0133437	0.0121254	352	-0.013951	0.0406385	a
131	high	Control_Pre_drought_2019	Planctomycetota	0.0146042	0.0121254	352	-0.0126906	0.0418989	a
132	low	Control_Pre_drought_2019	Planctomycetota	0.0151667	0.0121254	352	-0.0121281	0.0424614	a
133	high	Control_2019	Planctomycetota	0.00889583	0.0121254	352	-0.0183989	0.0361906	a
134	low	Control_2019	Planctomycetota	0.013625	0.0121254	352	-0.0136698	0.0409198	a
135	high	Drought_2019	Planctomycetota	0.00919792	0.0121254	352	-0.0180969	0.0364927	a
136	low	Drought_2019	Planctomycetota	0.00785417	0.0121254	352	-0.0194406	0.0351489	a
137	high	Control_Pre_drought_2020	Planctomycetota	0.00565625	0.0121254	352	-0.0216385	0.032951	a
138	low	Control_Pre_drought_2020	Planctomycetota	0.00692708	0.0121254	352	-0.0203677	0.0342219	a
139	high	Drought_Pre_drought_2037	Planctomycetota	0.00316667	0.0121254	352	-0.0241281	0.0304614	a
140	low	Drought_Pre_drought_2036	Planctomycetota	0.00557292	0.0121254	352	-0.0217219	0.0328677	a
141	high	Control_2020	Planctomycetota	0.00148958	0.0121254	352	-0.0258052	0.0287844	a
142	low	Control_2020	Planctomycetota	0.00215625	0.0121254	352	-0.0251385	0.029451	a
143	high	Drought_2020	Planctomycetota	0.00096875	0.0121254	352	-0.026326	0.0282635	a
144	low	Drought_2020	Planctomycetota	0.00182292	0.0121254	352	-0.0254719	0.0291177	a
145	high	Control_Pre_drought_2019	Proteobacteria	0.547656	0.0121254	352	0.520361	0.574951	a
146	low	Control_Pre_drought_2019	Proteobacteria	0.57925	0.0121254	352	0.551955	0.606545	a
147	high	Control_Pre_drought_2019	Proteobacteria	0.598948	0.0121254	352	0.571653	0.626243	a
148	low	Control_Pre_drought_2019	Proteobacteria	0.570302	0.0121254	352	0.543007	0.597597	a
149	high	Control_2019	Proteobacteria	0.477333	0.0121254	352	0.450039	0.504628	b
150	low	Control_2019	Proteobacteria	0.530698	0.0121254	352	0.503403	0.557993	a
151	high	Drought_2019	Proteobacteria	0.476542	0.0121254	352	0.449247	0.503836	a
152	low	Drought_2019	Proteobacteria	0.458583	0.0121254	352	0.431289	0.485878	a
153	high	Control_Pre_drought_2020	Proteobacteria	0.589573	0.0121254	352	0.562278	0.616868	a
154	low	Control_Pre_drought_2020	Proteobacteria	0.59974	0.0121254	352	0.572445	0.627034	a
155	high	Drought_Pre_drought_2038	Proteobacteria	0.54701	0.0121254	352	0.519716	0.574305	a
156	low	Drought_Pre_drought_2039	Proteobacteria	0.507094	0.0121254	352	0.479799	0.534389	b
157	high	Control_2020	Proteobacteria	0.525406	0.0121254	352	0.498111	0.552701	a
158	low	Control_2020	Proteobacteria	0.47226	0.0121254	352	0.444966	0.499555	b
159	high	Drought_2020	Proteobacteria	0.435562	0.0121254	352	0.408268	0.462857	a
160	low	Drought_2020	Proteobacteria	0.444719	0.0121254	352	0.417424	0.472014	a
161	high	Control_Pre_drought_2019	Verrucomicrobiota	0.0275625	0.0121254	352	0.000267729	0.0548573	a
162	low	Control_Pre_drought_2019	Verrucomicrobiota	0.0284063	0.0121254	352	0.00111148	0.055701	a
163	high	Control_Pre_drought_2019	Verrucomicrobiota	0.0259063	0.0121254	352	-0.00138852	0.053201	a
164	low	Control_Pre_drought_2019	Verrucomicrobiota	0.0263958	0.0121254	352	-0.000898937	0.0536906	a
165	high	Control_2019	Verrucomicrobiota	0.0287604	0.0121254	352	0.00146565	0.0560552	a
166	low	Control_2019	Verrucomicrobiota	0.0326563	0.0121254	352	0.00536148	0.059951	a
167	high	Drought_2019	Verrucomicrobiota	0.0299896	0.0121254	352	0.00269481	0.0572844	a
168	low	Drought_2019	Verrucomicrobiota	0.0272812	0.0121254	352	-1.35208e-05	0.054576	a
169	high	Control_Pre_drought_2020	Verrucomicrobiota	0.0240937	0.0121254	352	-0.00320102	0.0513885	a
170	low	Control_Pre_drought_2020	Verrucomicrobiota	0.0295104	0.0121254	352	0.00221565	0.0568052	a
171	high	Drought_Pre_drought_2040	Verrucomicrobiota	0.0241042	0.0121254	352	-0.0031906	0.0513989	a
172	low	Drought_Pre_drought_2041	Verrucomicrobiota	0.0221146	0.0121254	352	-0.00518019	0.0494094	a
173	high	Control_2020	Verrucomicrobiota	0.0185104	0.0121254	352	-0.00878435	0.0458052	a
174	low	Control_2020	Verrucomicrobiota	0.0260208	0.0121254	352	-0.00127394	0.0533156	a
175	high	Drought_2020	Verrucomicrobiota	0.0157188	0.0121254	352	-0.011576	0.0430135	a
176	low	Drought_2020	Verrucomicrobiota	0.0174896	0.0121254	352	-0.00980519	0.0447844	a

## Sheet: 5_Diff_abundance_High_diversity
5-Overall (years 1019 and 2020) differential abundances for Control and Drought treatments under High macrofauna functional diversity
Number	taxon_id	treatment_1	treatment_2	log2_median_ratio	median_diff	mean_diff	wilcox_p_value
1	ab	drought	Control	0.0163653	0.00154688	0.00359245	0.338375
2	ac	drought	Control	0.260721	0.00160937	0.00239583	0.01116
3	ad	drought	Control	-0.00847152	-7.8125e-05	0.0018125	0.968932
4	ae	drought	Control	-0.217362	-0.00510938	-0.0044362	0.00789582
5	af	drought	Control	0.153658	0.00367187	0.00247005	0.0828671
6	ag	drought	Control	0.322138	0.005375	0.00741016	0.00960868
7	ah	drought	Control	-0.0703893	-1.5625e-05	-0.00018099	0.806795
8	ai	drought	Control	-0.447075	-0.00284375	-0.00268229	0.00370017
9	aj	drought	Control	0.29404	0.00173438	0.00214193	0.00789582
10	ak	drought	Control	-1.01306	-0.000875	-0.000998698	0.0059651
11	al	drought	Control	-0.229026	-0.0005	-0.000654948	0.041069
12	am	drought	Control	0.284303	0.0006875	0.0005625	0.0676348
13	an	drought	Control	-0.443607	-0.000421875	-0.000535156	0.0197055
14	ao	drought	Control	-0.0369942	-3.125e-05	-0.000167969	0.531545
15	ap	drought	Control	0.290779	0.00071875	0.000904948	0.043513
16	aq	drought	Control	0.519374	0.000203125	0.000115885	0.145451
17	ar	drought	Control	-0.929611	-0.000296875	-0.000348958	0.00370017
18	as	drought	Control	1.12553	0.00040625	0.000390625	0.000764175
19	at	drought	Control	0	0	-1.04167e-05	0.670594
20	au	drought	Control	-0.584963	-3.125e-05	-4.29687e-05	0.33258
21	av	drought	Control	-2.45943	-0.000140625	-0.000132813	0.0378783
22	aw	drought	Control	1.58496	6.25e-05	0.000253906	0.5123
23	ax	drought	Control	0.678072	9.375e-05	0.000139323	0.0821876
24	ay	drought	Control	0	0	2.60417e-05	0.0401219
25	az	drought	Control	0	0	3.51562e-05	0.0271481
26	ba	drought	Control	#NAME?	-9.375e-05	-1.5625e-05	0.401072
27	bb	drought	Control	0	0	-4.03646e-05	0.043513
28	bc	drought	Control	0	0	-2.73438e-05	0.0401219
29	bd	drought	Control	-0.228397	-0.00146875	-0.00204297	0.00789582
30	be	drought	Control	-0.228362	-0.0040625	-0.00355599	0.0197042
31	bf	drought	Control	-0.514239	-0.00289062	-0.00227734	0.0197055
32	bg	drought	Control	0.243271	0.0016875	0.0011263	0.0902541
33	bh	drought	Control	0.287111	0.00282812	0.00303906	0.00370017
34	bi	drought	Control	0.463846	0.00421875	0.00605859	0.00893806
35	bj	drought	Control	-0.263034	-4.6875e-05	-0.000190104	0.954129
36	bk	drought	Control	0.302666	0.001375	0.00151693	0.0188485
37	bl	drought	Control	-0.406885	-0.00248438	-0.00253906	0.00421214
38	bm	drought	Control	0.29404	0.00173438	0.00214193	0.00789582
39	bn	drought	Control	0.978626	0.00103125	0.00395182	0.00789582
40	bo	drought	Control	-0.779874	-0.00059375	-0.000925781	0.00789582
41	bp	drought	Control	-0.116589	-0.00065625	-0.000880208	0.0709316
42	bq	drought	Control	-0.240398	-0.000515625	-0.00069401	0.0282259
43	br	drought	Control	-0.120854	-0.000140625	-0.00027474	0.156748
44	bs	drought	Control	-0.0790716	-6.25e-05	-3.64583e-05	0.572504
45	bt	drought	Control	-0.199033	-0.000390625	-0.000604167	0.0197055
46	bu	drought	Control	-0.569366	-0.000234375	-0.000348958	0.0561623
47	bv	drought	Control	-0.278301	-0.00015625	-0.000197917	0.230999
48	bw	drought	Control	0.450166	0.00040625	0.000454427	0.00789582
49	bx	drought	Control	0.353637	0.00078125	0.000615885	0.151154
50	by	drought	Control	0.519374	0.000203125	0.000115885	0.145451
51	bz	drought	Control	0.297681	0.00034375	0.000438802	0.0378783
52	ca	drought	Control	1.08746	0.000140625	0.00033724	0.077659
53	cb	drought	Control	-0.929611	-0.000296875	-0.000348958	0.00370017
54	cc	drought	Control	-0.289507	-6.25e-05	-3.51562e-05	0.352244
55	cd	drought	Control	-1	-0.00015625	-0.000143229	0.0799629
56	ce	drought	Control	1.5025	0.000515625	0.000390625	0.00789582
57	cf	drought	Control	1.12553	0.00040625	0.000390625	0.000764175
58	cg	drought	Control	0.438121	0.000171875	0.00018099	0.051595
59	ch	drought	Control	0.719892	0.000171875	0.000257813	0.0795597
60	ci	drought	Control	Inf	0.000171875	0.000111979	0.0401219
61	cj	drought	Control	-0.459432	-0.000140625	-0.000148437	0.249484
62	ck	drought	Control	0	0	-1.04167e-05	0.670594
63	cl	drought	Control	0.520832	0.00015625	0.000161458	0.124379
64	cm	drought	Control	-0.584963	-3.125e-05	-4.29687e-05	0.33258
65	cn	drought	Control	1	7.8125e-05	9.89583e-05	0.01116
66	co	drought	Control	1.32193	9.375e-05	7.03125e-05	0.0321391
67	cp	drought	Control	#NAME?	-0.00015625	-0.000164063	0.00574699
68	cq	drought	Control	0	0	-0.000278646	0.228792
69	cr	drought	Control	#NAME?	-3.125e-05	-8.46354e-05	0.171932
70	cs	drought	Control	1.58496	6.25e-05	0.000253906	0.5123
71	ct	drought	Control	Inf	0.000203125	0.000177083	0.00893806
72	cu	drought	Control	0.678072	9.375e-05	0.000139323	0.0821876
73	cv	drought	Control	0	0	-5.59896e-05	0.0688433
74	cw	drought	Control	0	0	2.60417e-05	0.0401219
75	cx	drought	Control	0	0	8.85417e-05	0.0197055
76	cy	drought	Control	0	0	-4.16667e-05	0.0718422
77	cz	drought	Control	0	0	3.51562e-05	0.0271481
78	da	drought	Control	#NAME?	-3.125e-05	-4.6875e-05	0.0688433
79	db	drought	Control	#NAME?	-3.125e-05	-9.375e-05	0.0059651
80	dc	drought	Control	0	0	3.125e-05	0.779048
81	dd	drought	Control	0	0	-2.47396e-05	0.0188485
82	de	drought	Control	#NAME?	-1.5625e-05	-4.81771e-05	0.0454393
83	df	drought	Control	Inf	3.125e-05	9.11458e-06	0.148557
84	dg	drought	Control	Inf	3.125e-05	3.90625e-05	0.0188485
85	dh	drought	Control	0	0	-4.03646e-05	0.043513
86	di	drought	Control	0	0	-2.73438e-05	0.0401219
87	dj	drought	Control	0	0	-6.77083e-05	0.0571267
88	dk	drought	Control	-0.218034	-0.00132813	-0.00183854	0.0127057
89	dl	drought	Control	-0.223407	-0.0031875	-0.00359115	0.0130247
90	dm	drought	Control	-0.514239	-0.00289062	-0.00227734	0.0197055
91	dn	drought	Control	0.146841	0.000890625	0.000604167	0.380912
92	do	drought	Control	0.157952	0.00109375	0.00157813	0.0188485
93	dp	drought	Control	0.640458	0.00207813	0.00279818	0.0261239
94	dq	drought	Control	#NAME?	-7.8125e-05	-0.000513021	0.0454393
95	dr	drought	Control	0.302666	0.001375	0.00151693	0.0188485
96	ds	drought	Control	0.0893309	0.000453125	0.00142318	0.259467
97	dt	drought	Control	-0.300659	-0.00148438	-0.00147786	0.0153084
98	du	drought	Control	-0.275634	-0.0003125	-0.000514323	0.0570456
99	dv	drought	Control	0.277167	0.001625	0.00203255	0.00973822
100	dw	drought	Control	0.412647	0.00078125	0.00056901	0.075814
101	dx	drought	Control	0.978626	0.00103125	0.00395182	0.00789582
102	dy	drought	Control	-0.779874	-0.00059375	-0.000925781	0.00789582
103	dz	drought	Control	-0.308753	-0.00065625	-0.00108594	0.0188485
104	ea	drought	Control	0.540938	0.00173438	0.0014388	0.00442572
105	eb	drought	Control	-0.286881	-0.000171875	-0.00021224	0.051595
106	ec	drought	Control	-0.736966	-0.00028125	-0.000204427	0.0267438
107	ed	drought	Control	-0.563267	-0.0005	-0.000398437	0.00484535
108	ee	drought	Control	-0.770518	-0.000375	-0.000300781	0.0188485
109	ef	drought	Control	-0.0790716	-6.25e-05	-3.64583e-05	0.572504
110	eg	drought	Control	-1.02076	-0.00110937	-0.000852865	0.00421214
111	eh	drought	Control	-0.514573	-0.000703125	-0.000779948	0.00173808
112	ei	drought	Control	0.222392	0.00028125	0.000696615	0.0188485
113	ej	drought	Control	-0.569366	-0.000234375	-0.000348958	0.0561623
114	ek	drought	Control	-0.367732	-0.000140625	-0.000210937	0.11561
115	el	drought	Control	0.450166	0.00040625	0.000454427	0.00789582
116	em	drought	Control	0.830075	0.00109375	0.000804687	0.026856
117	en	drought	Control	2.88264	0.00159375	0.00159635	0.00368041
118	eo	drought	Control	-0.470891	-0.00034375	-0.000427083	0.0187797
119	ep	drought	Control	0.782409	0.00028125	0.000220052	0.0248339
120	eq	drought	Control	0.459432	0.000375	0.000496094	0.0207488
121	er	drought	Control	-0.0641303	-1.5625e-05	-3.90625e-05	0.56793
122	es	drought	Control	1.08746	0.000140625	0.00033724	0.077659
123	et	drought	Control	-0.929611	-0.000296875	-0.000348958	0.00370017
124	eu	drought	Control	-0.289507	-6.25e-05	-3.51562e-05	0.352244
125	ev	drought	Control	-1	-0.00015625	-0.000143229	0.0799629
126	ew	drought	Control	0.106915	4.6875e-05	-1.82292e-05	0.908303
127	ex	drought	Control	#NAME?	-0.00028125	-0.00016276	0.0568108
128	ey	drought	Control	1	0.00028125	0.000294271	0.0188485
129	ez	drought	Control	Inf	0.0004375	0.000285156	0.00789582
130	fa	drought	Control	0.966833	0.000328125	0.000265625	0.00701248
131	fb	drought	Control	-0.874469	-0.000234375	3.25521e-05	0.905125
132	fc	drought	Control	1.20163	0.000203125	0.000197917	0.0688099
133	fd	drought	Control	1.73697	0.000109375	0.000299479	0.0958737
134	fe	drought	Control	2.08746	0.00040625	0.00043099	0.00393107
135	ff	drought	Control	-1.22239	-0.0004375	-0.000356771	0.000764175
136	fg	drought	Control	-0.111031	-3.125e-05	0.000324219	0.564927
137	fh	drought	Control	-0.584963	-0.000125	-0.000205729	0.0853347
138	fi	drought	Control	1.12553	0.00040625	0.000390625	0.000764175
139	fj	drought	Control	0.438121	0.000171875	0.00018099	0.051595
140	fk	drought	Control	-0.556393	-0.000125	-0.000147135	0.0280041
141	fl	drought	Control	-1.152	-0.000171875	-0.000208333	0.0059651
142	fm	drought	Control	0.115477	3.125e-05	-5.72917e-05	0.670594
143	fn	drought	Control	0.152003	9.375e-05	4.6875e-05	0.509954
144	fo	drought	Control	0.719892	0.000171875	0.000257813	0.0795597
145	fp	drought	Control	Inf	0.000171875	0.000111979	0.0401219
146	fq	drought	Control	-0.459432	-0.000140625	-0.000148437	0.249484
147	fr	drought	Control	0	0	-1.04167e-05	0.670594
148	fs	drought	Control	0	0	-3.64583e-05	0.82432
149	ft	drought	Control	1.45943	0.00021875	0.00015625	0.0512471
150	fu	drought	Control	0.415037	3.125e-05	4.16667e-05	0.672553
151	fv	drought	Control	#NAME?	-0.000234375	-0.000115885	0.121855
152	fw	drought	Control	1.53051	0.000265625	0.00019401	0.0188485
153	fx	drought	Control	-0.584963	-3.125e-05	-4.29687e-05	0.33258
154	fy	drought	Control	1	7.8125e-05	9.89583e-05	0.01116
155	fz	drought	Control	#NAME?	-0.000125	-0.000111979	0.0059651
156	ga	drought	Control	1.32193	9.375e-05	7.03125e-05	0.0321391
157	gb	drought	Control	-1	-0.00021875	-0.000145833	0.0918266
158	gc	drought	Control	#NAME?	-0.00015625	-0.000164063	0.00574699
159	gd	drought	Control	0.180572	3.125e-05	1.30208e-05	0.650142
160	ge	drought	Control	0	0	-0.000278646	0.228792
161	gf	drought	Control	2	0.000234375	0.000192708	0.00789582
162	gg	drought	Control	#NAME?	-3.125e-05	-8.46354e-05	0.171932
163	gh	drought	Control	#NAME?	-0.00015625	-0.000140625	0.00370017
164	gi	drought	Control	0	0	8.46354e-05	0.0378783
165	gj	drought	Control	1.58496	6.25e-05	0.000253906	0.5123
166	gk	drought	Control	Inf	0.000203125	0.000177083	0.00893806
167	gl	drought	Control	0.678072	9.375e-05	0.000139323	0.0821876
168	gm	drought	Control	0	0	-5.59896e-05	0.0688433
169	gn	drought	Control	#NAME?	-6.25e-05	-9.24479e-05	0.0401219
170	go	drought	Control	Inf	4.6875e-05	8.46354e-05	0.0267438
171	gp	drought	Control	0	0	5.33854e-05	0.0456776
172	gq	drought	Control	0	0	0.00011849	0.00789582
173	gr	drought	Control	0	0	2.60417e-05	0.0401219
174	gs	drought	Control	0	0	8.85417e-05	0.0197055
175	gt	drought	Control	#NAME?	-1.5625e-05	-6.38021e-05	0.0606286
176	gu	drought	Control	0	0	-4.16667e-05	0.0718422
177	gv	drought	Control	Inf	0.0001875	0.000169271	0.00789582
178	gw	drought	Control	0	0	3.51562e-05	0.0271481
179	gx	drought	Control	0	0	-0.000101562	0.0267438
180	gy	drought	Control	#NAME?	-3.125e-05	-4.6875e-05	0.0688433
181	gz	drought	Control	#NAME?	-3.125e-05	-9.375e-05	0.0059651
182	ha	drought	Control	0	0	6.64063e-05	0.0853347
183	hb	drought	Control	0	0	-2.47396e-05	0.0188485
184	hc	drought	Control	0	0	7.55208e-05	0.0267438
185	hd	drought	Control	#NAME?	-1.5625e-05	-4.81771e-05	0.0454393
186	he	drought	Control	0	0	0.000109375	0.0248339
187	hf	drought	Control	0	0	1.95313e-05	0.0558618
188	hg	drought	Control	Inf	3.125e-05	3.90625e-05	0.0188485
189	hh	drought	Control	0	0	-1.04167e-05	0.672553
190	hi	drought	Control	0	0	-2.73438e-05	0.0267438
191	hj	drought	Control	0	0	-0.000104167	0.0059651
192	hk	drought	Control	0	0	2.34375e-05	0.0401219
193	hl	drought	Control	0	0	-4.03646e-05	0.043513
194	hm	drought	Control	0	0	-2.86458e-05	0.0571267
195	hn	drought	Control	0	0	2.21354e-05	0.0267438
196	ho	drought	Control	0	0	-5.98958e-05	0.0401219
197	hp	drought	Control	0	0	-2.73438e-05	0.0401219
198	hq	drought	Control	0	0	-6.77083e-05	0.0571267
199	hr	drought	Control	0	0	-3.38542e-05	0.124379
200	hs	drought	Control	0	0	-2.08333e-05	0.04078
201	ht	drought	Control	0	0	2.21354e-05	0.0568108
202	hu	drought	Control	0	0	-3.51562e-05	0.0267438
203	hv	drought	Control	-0.206248	-0.00114062	-0.0014987	0.0282259
204	hw	drought	Control	-0.285826	-0.0026875	-0.0034375	0.00370458
205	hx	drought	Control	-0.514239	-0.00289062	-0.00227734	0.0197055
206	hy	drought	Control	0.723669	0.00221875	0.002	0.0059651
207	hz	drought	Control	0.157952	0.00109375	0.00157813	0.0188485
208	ia	drought	Control	0.488887	0.0015	0.00254297	0.0267438
209	ib	drought	Control	#NAME?	-7.8125e-05	-0.000513021	0.0454393
210	ic	drought	Control	0.302666	0.001375	0.00151693	0.0188485
211	id	drought	Control	-0.426733	-0.00115625	-0.00139583	0.00421214
212	ie	drought	Control	0.51134	0.000890625	0.00194661	0.0188485
213	if	drought	Control	-0.343515	-0.00167187	-0.00155339	0.00789582
214	ig	drought	Control	-0.252766	-0.00028125	-0.000457031	0.0803133
215	ih	drought	Control	0.437267	0.000890625	0.00096875	0.0618666
216	ii	drought	Control	-0.216679	-0.000640625	-0.000523438	0.154001
217	ij	drought	Control	0.277167	0.001625	0.00203255	0.00973822
218	ik	drought	Control	0.412647	0.00078125	0.00056901	0.075814
219	il	drought	Control	-0.531447	-0.000828125	-0.000467448	0.0902541
220	im	drought	Control	0.978626	0.00103125	0.00395182	0.00789582
221	in	drought	Control	-0.920566	-0.000390625	-0.000536458	0.0250532
222	io	drought	Control	-0.308753	-0.00065625	-0.00108594	0.0188485
223	ip	drought	Control	0.516576	0.00145312	0.00132813	0.00368041
224	iq	drought	Control	-0.286881	-0.000171875	-0.00021224	0.051595
225	ir	drought	Control	-0.26748	-0.00034375	-0.000549479	0.0454393
226	is	drought	Control	-0.736966	-0.00028125	-0.000204427	0.0267438
227	it	drought	Control	-0.563267	-0.0005	-0.000398437	0.00484535
228	iu	drought	Control	-0.770518	-0.000375	-0.000300781	0.0188485
229	iv	drought	Control	-0.0790716	-6.25e-05	-3.64583e-05	0.572504
230	iw	drought	Control	-0.807355	-0.000609375	-0.000536458	0.0059651
231	ix	drought	Control	-0.61471	-0.000265625	-0.00019401	0.0383156
232	iy	drought	Control	0.391191	0.000296875	0.000417969	0.027315
233	iz	drought	Control	-0.569366	-0.000234375	-0.000348958	0.0561623
234	ja	drought	Control	-0.367732	-0.000140625	-0.000210937	0.11561
235	jb	drought	Control	0.450166	0.00040625	0.000454427	0.00789582
236	jc	drought	Control	-0.455679	-0.00040625	-0.000585937	0.00901555
237	jd	drought	Control	0.387023	0.0003125	0.000309896	0.042791
238	je	drought	Control	2.88264	0.00159375	0.00159635	0.00368041
239	jf	drought	Control	-0.470891	-0.00034375	-0.000427083	0.0187797
240	jg	drought	Control	0.530515	0.00025	0.000315104	0.0149291
241	jh	drought	Control	-0.634716	-0.000328125	-0.000339844	0.0215196
242	ji	drought	Control	0.184425	4.6875e-05	0.000132813	0.0678389
243	jj	drought	Control	0.661198	0.000390625	0.000388021	0.0368074
244	jk	drought	Control	0.534336	0.000203125	0.000239583	0.0350307
245	jl	drought	Control	0.0874628	1.5625e-05	-0.000166667	0.197016
246	jm	drought	Control	-0.0641303	-1.5625e-05	-3.90625e-05	0.56793
247	jn	drought	Control	1.08746	0.000140625	0.00033724	0.077659
248	jo	drought	Control	-0.929611	-0.000296875	-0.000348958	0.00370017
249	jp	drought	Control	-0.289507	-6.25e-05	-3.51562e-05	0.352244
250	jq	drought	Control	-1	-0.00015625	-0.000143229	0.0799629
251	jr	drought	Control	0.106915	4.6875e-05	-1.82292e-05	0.908303
252	js	drought	Control	#NAME?	-0.00028125	-0.00016276	0.0568108
253	jt	drought	Control	0.912537	0.000234375	0.000207031	0.0512074
254	ju	drought	Control	Inf	0.0004375	0.000285156	0.00789582
255	jv	drought	Control	#NAME?	-4.6875e-05	-0.00014974	0.0700578
256	jw	drought	Control	0.966833	0.000328125	0.000265625	0.00701248
257	jx	drought	Control	0.14439	3.125e-05	-0.000179687	0.866661
258	jy	drought	Control	-0.874469	-0.000234375	3.25521e-05	0.905125
259	jz	drought	Control	1.20163	0.000203125	0.000197917	0.0688099
260	ka	drought	Control	1.73697	0.000109375	0.000299479	0.0958737
261	kb	drought	Control	2.08746	0.00040625	0.00043099	0.00393107
262	kc	drought	Control	-1.22239	-0.0004375	-0.000356771	0.000764175
263	kd	drought	Control	-0.111031	-3.125e-05	0.000324219	0.564927
264	ke	drought	Control	-0.584963	-0.000125	-0.000205729	0.0853347
265	kf	drought	Control	1.12553	0.00040625	0.000390625	0.000764175
266	kg	drought	Control	0.438121	0.000171875	0.00018099	0.051595
267	kh	drought	Control	0	0	-0.000128906	0.0571267
268	ki	drought	Control	-0.556393	-0.000125	-0.000147135	0.0280041
269	kj	drought	Control	-1.05063	-0.000234375	-0.000416667	0.00893806
270	kk	drought	Control	-1.58496	-0.0001875	-0.000210937	0.00421214
271	kl	drought	Control	0.115477	3.125e-05	-5.72917e-05	0.670594
272	km	drought	Control	0.459432	9.375e-05	0.000108073	0.0570456
273	kn	drought	Control	0.152003	9.375e-05	4.6875e-05	0.509954
274	ko	drought	Control	0.719892	0.000171875	0.000257813	0.0795597
275	kp	drought	Control	1.26303	0.000109375	8.72396e-05	0.0401219
276	kq	drought	Control	Inf	0.000171875	0.000111979	0.0401219
277	kr	drought	Control	-0.459432	-0.000140625	-0.000148437	0.249484
278	ks	drought	Control	Inf	0.00034375	0.000324219	0.0601496
279	kt	drought	Control	0	0	-1.04167e-05	0.670594
280	ku	drought	Control	0	0	-8.20313e-05	0.0568108
281	kv	drought	Control	1.45943	0.00021875	0.00015625	0.0512471
282	kw	drought	Control	0.415037	3.125e-05	4.16667e-05	0.672553
283	kx	drought	Control	#NAME?	-0.000234375	-0.000115885	0.121855
284	ky	drought	Control	Inf	7.8125e-05	0.000255208	0.0188485
285	kz	drought	Control	1.53051	0.000265625	0.00019401	0.0188485
286	la	drought	Control	-0.584963	-3.125e-05	-4.29687e-05	0.33258
287	lb	drought	Control	1	7.8125e-05	9.89583e-05	0.01116
288	lc	drought	Control	#NAME?	-0.000125	-0.000111979	0.0059651
289	ld	drought	Control	1.32193	9.375e-05	7.03125e-05	0.0321391
290	le	drought	Control	-1	-0.00021875	-0.000145833	0.0918266
291	lf	drought	Control	#NAME?	-0.00015625	-0.000164063	0.00574699
292	lg	drought	Control	0.180572	3.125e-05	1.30208e-05	0.650142
293	lh	drought	Control	Inf	0.000125	8.72396e-05	0.014746
294	li	drought	Control	0	0	-0.000278646	0.228792
295	lj	drought	Control	2	0.000234375	0.000192708	0.00789582
296	lk	drought	Control	#NAME?	-3.125e-05	-8.46354e-05	0.171932
297	ll	drought	Control	#NAME?	-0.00015625	-0.000140625	0.00370017
298	lm	drought	Control	0	0	8.46354e-05	0.0378783
299	ln	drought	Control	1.58496	6.25e-05	0.000253906	0.5123
300	lo	drought	Control	Inf	6.25e-05	7.55208e-05	0.023153
301	lp	drought	Control	1.58496	0.00021875	0.00035026	0.0112913
302	lq	drought	Control	Inf	0.000109375	0.000127604	0.0188485
303	lr	drought	Control	0.678072	9.375e-05	0.000139323	0.0821876
304	ls	drought	Control	0	0	-5.72917e-05	0.0645924
305	lt	drought	Control	0	0	-5.59896e-05	0.0688433
306	lu	drought	Control	#NAME?	-6.25e-05	-9.24479e-05	0.0401219
307	lv	drought	Control	Inf	4.6875e-05	8.46354e-05	0.0267438
308	lw	drought	Control	0	0	5.33854e-05	0.0456776
309	lx	drought	Control	0	0	4.16667e-05	0.0401219
310	ly	drought	Control	Inf	6.25e-05	4.94792e-05	0.0188485
311	lz	drought	Control	0	0	2.60417e-05	0.0401219
312	ma	drought	Control	0	0	8.85417e-05	0.0197055
313	mb	drought	Control	#NAME?	-1.5625e-05	-6.38021e-05	0.0606286
314	mc	drought	Control	0	0	-4.16667e-05	0.0718422
315	md	drought	Control	Inf	0.0001875	0.000169271	0.00789582
316	me	drought	Control	0	0	-3.25521e-05	0.0401219
317	mf	drought	Control	0	0	3.51562e-05	0.0271481
318	mg	drought	Control	0	0	-0.000101562	0.0267438
319	mh	drought	Control	#NAME?	-3.125e-05	-4.6875e-05	0.0688433
320	mi	drought	Control	#NAME?	-3.125e-05	-9.375e-05	0.0059651
321	mj	drought	Control	0	0	6.64063e-05	0.0853347
322	mk	drought	Control	0	0	-2.47396e-05	0.0188485
323	ml	drought	Control	0	0	7.55208e-05	0.0267438
324	mm	drought	Control	0	0	4.55729e-05	0.0714049
325	mn	drought	Control	#NAME?	-1.5625e-05	-4.81771e-05	0.0454393
326	mo	drought	Control	0	0	0.000109375	0.0248339
327	mp	drought	Control	0	0	1.95313e-05	0.0558618
328	mq	drought	Control	0	0	-0.000105469	0.0271481
329	mr	drought	Control	0	0	7.68229e-05	0.0267438
330	ms	drought	Control	Inf	3.125e-05	3.90625e-05	0.0188485
331	mt	drought	Control	0	0	-1.04167e-05	0.672553
332	mu	drought	Control	#NAME?	-1.5625e-05	2.73438e-05	0.441878
333	mv	drought	Control	0	0	-2.73438e-05	0.0267438
334	mw	drought	Control	0	0	-0.000104167	0.0059651
335	mx	drought	Control	0	0	2.34375e-05	0.0401219
336	my	drought	Control	0	0	-4.03646e-05	0.043513
337	mz	drought	Control	0	0	-2.86458e-05	0.0571267
338	na	drought	Control	0	0	2.21354e-05	0.0267438
339	nb	drought	Control	0	0	-5.98958e-05	0.0401219
340	nc	drought	Control	0	0	-3.64583e-05	0.0945415
341	nd	drought	Control	0	0	-2.73438e-05	0.0401219
342	ne	drought	Control	0	0	-6.77083e-05	0.0571267
343	nf	drought	Control	0	0	-3.38542e-05	0.124379
344	ng	drought	Control	0	0	3.51562e-05	0.0700363
345	nh	drought	Control	0	0	-2.08333e-05	0.04078
346	ni	drought	Control	0	0	2.21354e-05	0.0568108
347	nj	drought	Control	0	0	-3.51562e-05	0.0267438
348	nk	drought	Control	-0.206248	-0.00114062	-0.0014987	0.0282259
349	nl	drought	Control	-0.342888	-0.00240625	-0.00293359	0.00789582
350	nm	drought	Control	-0.514239	-0.00289062	-0.00227734	0.0197055
351	nn	drought	Control	0.723669	0.00221875	0.002	0.0059651
352	no	drought	Control	0.157952	0.00109375	0.00157813	0.0188485
353	np	drought	Control	0.511983	0.00148438	0.00238672	0.0261239
354	nq	drought	Control	#NAME?	-7.8125e-05	-0.000513021	0.0454393
355	nr	drought	Control	0.302666	0.001375	0.00151693	0.0188485
356	ns	drought	Control	-0.459432	-0.00107813	-0.00123177	0.00777912
357	nt	drought	Control	0.51134	0.000890625	0.00194661	0.0188485
358	nu	drought	Control	-0.322666	-0.00153125	-0.00167578	0.00789582
359	nv	drought	Control	-0.252766	-0.00028125	-0.000457031	0.0803133
360	nw	drought	Control	0.321928	0.00059375	0.0008125	0.098332
361	nx	drought	Control	-0.368387	-0.00075	-0.000852865	0.0188485
362	ny	drought	Control	0.265636	0.000875	0.00119922	0.0188485
363	nz	drought	Control	0.412647	0.00078125	0.00056901	0.075814
364	oa	drought	Control	-0.248576	-0.00034375	-0.0003125	0.198208
365	ob	drought	Control	0.309205	0.000765625	0.000833333	0.0188485
366	oc	drought	Control	-0.10334	-0.000234375	-0.000450521	0.375666
367	od	drought	Control	0.978626	0.00103125	0.00395182	0.00789582
368	oe	drought	Control	-0.920566	-0.000390625	-0.000536458	0.0250532
369	of	drought	Control	-0.596103	-0.00034375	-0.000561198	0.0161609
370	og	drought	Control	0.516576	0.00145312	0.00132813	0.00368041
371	oh	drought	Control	0.336049	0.00025	0.000329427	0.042791
372	oi	drought	Control	-0.286881	-0.000171875	-0.00021224	0.051595
373	oj	drought	Control	-0.26748	-0.00034375	-0.000549479	0.0454393
374	ok	drought	Control	-0.672835	-0.000640625	-0.000688802	0.0378783
375	ol	drought	Control	-0.736966	-0.00028125	-0.000204427	0.0267438
376	om	drought	Control	-0.30895	-0.00025	-0.00027474	0.0255078
377	on	drought	Control	-0.770518	-0.000375	-0.000300781	0.0188485
378	oo	drought	Control	0.567041	0.000203125	0.000153646	0.0302161
379	op	drought	Control	-0.656046	-0.000296875	-0.000257813	0.0439342
380	oq	drought	Control	-0.61471	-0.000265625	-0.00019401	0.0383156
381	or	drought	Control	0.353637	0.00015625	0.00021224	0.0983088
382	os	drought	Control	-0.569366	-0.000234375	-0.000348958	0.0561623
383	ot	drought	Control	-0.367732	-0.000140625	-0.000210937	0.11561
384	ou	drought	Control	0.530515	0.0001875	0.000239583	0.0267438
385	ov	drought	Control	0.450166	0.00040625	0.000454427	0.00789582
386	ow	drought	Control	0.367732	0.000140625	0.000205729	0.0317495
387	ox	drought	Control	-0.455679	-0.00040625	-0.000585937	0.00901555
388	oy	drought	Control	0.381871	0.00015625	0.000238281	0.0460805
389	oz	drought	Control	Inf	0.000296875	0.000286458	0.0267438
390	pa	drought	Control	-0.449307	-0.000296875	-0.00035026	0.0255078
391	pb	drought	Control	0.765535	0.00021875	0.000177083	0.0188485
392	pc	drought	Control	1.11548	0.00021875	0.000415365	0.163646
393	pd	drought	Control	-0.634716	-0.000328125	-0.000339844	0.0215196
394	pe	drought	Control	-0.428843	-0.000140625	-0.000164063	0.0991123
395	pf	drought	Control	0.184425	4.6875e-05	0.000132813	0.0678389
396	pg	drought	Control	0.661198	0.000390625	0.000388021	0.0368074
397	ph	drought	Control	0.754888	0.000171875	0.000170573	0.118876
398	pi	drought	Control	0.534336	0.000203125	0.000239583	0.0350307
399	pj	drought	Control	0.0874628	1.5625e-05	-0.000166667	0.197016
400	pk	drought	Control	-0.0641303	-1.5625e-05	-3.90625e-05	0.56793
401	pl	drought	Control	1.08746	0.000140625	0.00033724	0.077659
402	pm	drought	Control	-0.929611	-0.000296875	-0.000348958	0.00370017
403	pn	drought	Control	-0.289507	-6.25e-05	-3.51562e-05	0.352244
404	po	drought	Control	-1	-0.00015625	-0.000143229	0.0799629
405	pp	drought	Control	0.106915	4.6875e-05	-1.82292e-05	0.908303
406	pq	drought	Control	#NAME?	-0.00028125	-0.00016276	0.0568108
407	pr	drought	Control	0.912537	0.000234375	0.000207031	0.0512074
408	ps	drought	Control	Inf	0.00034375	0.000223958	0.0192455
409	pt	drought	Control	#NAME?	-4.6875e-05	-0.00014974	0.0700578
410	pu	drought	Control	0.966833	0.000328125	0.000265625	0.00701248
411	pv	drought	Control	0.14439	3.125e-05	-0.000179687	0.866661
412	pw	drought	Control	0.0874628	1.5625e-05	-3.90625e-06	0.99172
413	px	drought	Control	1.20163	0.000203125	0.000197917	0.0688099
414	py	drought	Control	0.392317	7.8125e-05	0.00015625	0.0880891
415	pz	drought	Control	1.73697	0.000109375	0.000299479	0.0958737
416	qa	drought	Control	2.08746	0.00040625	0.00043099	0.00393107
417	qb	drought	Control	-1.22239	-0.0004375	-0.000356771	0.000764175
418	qc	drought	Control	-0.231326	-6.25e-05	0.000279948	0.923048
419	qd	drought	Control	-0.584963	-0.000125	-0.000205729	0.0853347
420	qe	drought	Control	1.12553	0.00040625	0.000390625	0.000764175
421	qf	drought	Control	0.438121	0.000171875	0.00018099	0.051595
422	qg	drought	Control	0	0	-0.000128906	0.0571267
423	qh	drought	Control	-0.556393	-0.000125	-0.000147135	0.0280041
424	qi	drought	Control	-1.05063	-0.000234375	-0.000416667	0.00893806
425	qj	drought	Control	-0.807355	-9.375e-05	-8.59375e-05	0.0250532
426	qk	drought	Control	-0.342888	-0.000171875	-0.000190104	0.0454393
427	ql	drought	Control	-1.58496	-0.0001875	-0.000210937	0.00421214
428	qm	drought	Control	1.32193	0.000234375	0.00015625	0.0460805
429	qn	drought	Control	0.115477	3.125e-05	-5.72917e-05	0.670594
430	qo	drought	Control	0.459432	9.375e-05	0.000108073	0.0570456
431	qp	drought	Control	Inf	0.00015625	0.000197917	0.0401219
432	qq	drought	Control	0.106915	6.25e-05	5.20833e-06	0.806795
433	qr	drought	Control	#NAME?	-9.375e-05	-7.55208e-05	0.0490501
434	qs	drought	Control	1.90689	0.000171875	0.000138021	0.0821876
435	qt	drought	Control	0.719892	0.000171875	0.000257813	0.0795597
436	qu	drought	Control	1.26303	0.000109375	8.72396e-05	0.0401219
437	qv	drought	Control	Inf	0.000171875	0.000111979	0.0401219
438	qw	drought	Control	-0.459432	-0.000140625	-0.000148437	0.249484
439	qx	drought	Control	-1.58496	-0.000125	-9.89583e-05	0.0267438
440	qy	drought	Control	#NAME?	-0.000359375	-0.000154948	0.0718422
441	qz	drought	Control	0	0	0.000770833	0.0188485
442	ra	drought	Control	Inf	0.00034375	0.000324219	0.0601496
443	rb	drought	Control	0	0	-1.04167e-05	0.670594
444	rc	drought	Control	0	0	-8.20313e-05	0.0568108
445	rd	drought	Control	1.45943	0.00021875	0.00015625	0.0512471
446	re	drought	Control	0.415037	3.125e-05	4.16667e-05	0.672553
447	rf	drought	Control	#NAME?	-0.000234375	-0.000115885	0.121855
448	rg	drought	Control	Inf	7.8125e-05	0.000255208	0.0188485
449	rh	drought	Control	1.53051	0.000265625	0.00019401	0.0188485
450	ri	drought	Control	-0.584963	-3.125e-05	-4.29687e-05	0.33258
451	rj	drought	Control	1	7.8125e-05	9.89583e-05	0.01116
452	rk	drought	Control	0	0	-0.000123698	0.0845742
453	rl	drought	Control	#NAME?	-0.000125	-0.000111979	0.0059651
454	rm	drought	Control	1.32193	9.375e-05	7.03125e-05	0.0321391
455	rn	drought	Control	#NAME?	-0.0001875	-0.000122396	0.00789582
456	ro	drought	Control	#NAME?	-0.00015625	-0.000164063	0.00574699
457	rp	drought	Control	0.180572	3.125e-05	1.30208e-05	0.650142
458	rq	drought	Control	-0.485427	-6.25e-05	-2.34375e-05	0.684563
459	rr	drought	Control	Inf	0.000125	8.72396e-05	0.014746
460	rs	drought	Control	Inf	7.8125e-05	7.42187e-05	0.0426932
461	rt	drought	Control	0	0	-0.000278646	0.228792
462	ru	drought	Control	2	0.000234375	0.000192708	0.00789582
463	rv	drought	Control	#NAME?	-3.125e-05	-8.46354e-05	0.171932
464	rw	drought	Control	#NAME?	-0.00015625	-0.000140625	0.00370017
465	rx	drought	Control	0	0	8.46354e-05	0.0378783
466	ry	drought	Control	1.58496	6.25e-05	0.000253906	0.5123
467	rz	drought	Control	Inf	6.25e-05	7.55208e-05	0.023153
468	sa	drought	Control	#NAME?	-4.6875e-05	1.69271e-05	0.779048
469	sb	drought	Control	Inf	0.000109375	0.000127604	0.0188485
470	sc	drought	Control	0	0	0.000123698	0.0446876
471	sd	drought	Control	0.678072	9.375e-05	0.000139323	0.0821876
472	se	drought	Control	0	0	-0.000197917	0.0123141
473	sf	drought	Control	0	0	-5.72917e-05	0.0645924
474	sg	drought	Control	-2.80735	-9.375e-05	-7.55208e-05	0.0891539
475	sh	drought	Control	0	0	-5.59896e-05	0.0688433
476	si	drought	Control	#NAME?	-4.6875e-05	-6.51042e-05	0.0300033
477	sj	drought	Control	Inf	0.000296875	0.000333333	0.00273429
478	sk	drought	Control	#NAME?	-6.25e-05	-9.24479e-05	0.0401219
479	sl	drought	Control	-0.222392	-1.5625e-05	-4.6875e-05	0.0831664
480	sm	drought	Control	Inf	4.6875e-05	8.46354e-05	0.0267438
481	sn	drought	Control	0	0	5.33854e-05	0.0456776
482	so	drought	Control	0	0	4.16667e-05	0.0401219
483	sp	drought	Control	Inf	6.25e-05	4.94792e-05	0.0188485
484	sq	drought	Control	0	0	2.60417e-05	0.0401219
485	sr	drought	Control	0	0	8.85417e-05	0.0197055
486	ss	drought	Control	#NAME?	-1.5625e-05	-6.38021e-05	0.0606286
487	st	drought	Control	0	0	-4.16667e-05	0.0718422
488	su	drought	Control	0	0	4.42708e-05	0.0600317
489	sv	drought	Control	#NAME?	-9.375e-05	-9.375e-05	0.0271481
490	sw	drought	Control	Inf	0.0001875	0.000169271	0.00789582
491	sx	drought	Control	0	0	-3.25521e-05	0.0401219
492	sy	drought	Control	0	0	6.11979e-05	0.0718422
493	sz	drought	Control	0	0	3.51562e-05	0.0271481
494	ta	drought	Control	0	0	-4.29687e-05	0.0918266
495	tb	drought	Control	#NAME?	-3.125e-05	-4.6875e-05	0.0688433
496	tc	drought	Control	Inf	9.375e-05	4.16667e-05	0.0454393
497	td	drought	Control	#NAME?	-3.125e-05	-9.375e-05	0.0059651
498	te	drought	Control	0	0	6.64063e-05	0.0853347
499	tf	drought	Control	0	0	-5.33854e-05	0.0192088
500	tg	drought	Control	0	0	-2.47396e-05	0.0188485
501	th	drought	Control	0	0	2.47396e-05	0.0267438
502	ti	drought	Control	0	0	7.55208e-05	0.0267438
503	tj	drought	Control	0	0	4.55729e-05	0.0714049
504	tk	drought	Control	#NAME?	-1.5625e-05	-4.81771e-05	0.0454393
505	tl	drought	Control	0	0	8.07292e-05	0.0568108
506	tm	drought	Control	0	0	1.95313e-05	0.0558618
507	tn	drought	Control	0	0	-0.000105469	0.0271481
508	to	drought	Control	0	0	7.68229e-05	0.0267438
509	tp	drought	Control	0	0	-2.99479e-05	0.0446876
510	tq	drought	Control	Inf	3.125e-05	3.90625e-05	0.0188485
511	tr	drought	Control	0	0	-5.85937e-05	0.0378783
512	ts	drought	Control	0	0	0.000101562	0.0267438
513	tt	drought	Control	0	0	-1.04167e-05	0.672553
514	tu	drought	Control	#NAME?	-1.5625e-05	2.73438e-05	0.441878
515	tv	drought	Control	0	0	-2.73438e-05	0.0267438
516	tw	drought	Control	0	0	-0.000104167	0.0059651
517	tx	drought	Control	0	0	2.34375e-05	0.0401219
518	ty	drought	Control	0	0	-4.03646e-05	0.043513
519	tz	drought	Control	0	0	-2.86458e-05	0.0571267
520	ua	drought	Control	0	0	2.86458e-05	0.0918266
521	ub	drought	Control	0	0	2.21354e-05	0.0267438
522	uc	drought	Control	0	0	-5.98958e-05	0.0401219
523	ud	drought	Control	0	0	-3.64583e-05	0.0945415
524	ue	drought	Control	0	0	-2.73438e-05	0.0401219
525	uf	drought	Control	0	0	-6.77083e-05	0.0571267
526	ug	drought	Control	0	0	-3.38542e-05	0.124379
527	uh	drought	Control	0	0	3.51562e-05	0.0700363
528	ui	drought	Control	0	0	-2.08333e-05	0.04078
529	uj	drought	Control	0	0	2.21354e-05	0.0568108
530	uk	drought	Control	0	0	-3.51562e-05	0.0267438

## Sheet: 6_Diff_abundance_Low_diversity
6-Overall (years 1019 and 2020) differential abundances for Control and Drought treatments under Low macrofauna functional diversity
Number	taxon_id	treatment_1	treatment_2	log2_median_ratio	median_diff	mean_diff	wilcox_p_value
1	ab	drought	Control	-0.118977	-0.0116562	-0.0135616	0.0315325
2	ac	drought	Control	0.314109	0.00028125	-0.00022945	0.616853
3	ad	drought	Control	-0.329547	-0.0118125	-0.00875204	0.00709873
4	ae	drought	Control	-0.439334	-0.00409375	-0.00302944	0.0672119
5	af	drought	Control	0.0489096	0.000578125	0.00244163	0.160136
6	ag	drought	Control	-0.132822	-0.0014375	8.39561e-05	0.80665
7	ah	drought	Control	-0.462791	-0.00184375	-0.00160281	0.0276121
8	ai	drought	Control	-0.187892	-0.000578125	-0.001253	0.101223
9	aj	drought	Control	0.403578	0.0031875	0.0023138	0.00140009
10	ak	drought	Control	-0.330243	-0.00139062	-0.00157948	0.0139629
11	al	drought	Control	-0.520832	-0.0003125	-0.000316519	0.00749896
12	am	drought	Control	-0.301656	-0.0003125	-0.000377151	0.18335
13	an	drought	Control	-0.714598	-0.00078125	-0.000759567	0.000210408
14	ao	drought	Control	0.314109	0.00028125	-0.00022945	0.616853
15	ap	drought	Control	#NAME?	-0.0001875	-0.000129416	0.00550651
16	aq	drought	Control	-1.80735	-0.000234375	-0.000183028	0.000235823
17	ar	drought	Control	0	0	-0.00025	0.0234302
18	as	drought	Control	0.152003	1.5625e-05	-2.34941e-05	0.644613
19	at	drought	Control	0	0	-9.5505e-05	0.0629141
20	au	drought	Control	2	0.000140625	0.000158118	0.000439869
21	av	drought	Control	#NAME?	-0.00028125	-0.000188179	0.0003831
22	aw	drought	Control	0	0	-5.03284e-05	0.00885772
23	ax	drought	Control	#NAME?	-3.125e-05	2.5702e-05	0.682635
24	ay	drought	Control	Inf	9.375e-05	5.72351e-05	0.0268363
25	az	drought	Control	0	0	-3.25521e-05	0.00292616
26	ba	drought	Control	0	0	-1.95313e-05	0.0119032
27	bb	drought	Control	-0.393533	-0.0105156	-0.0073502	0.012027
28	bc	drought	Control	-0.439334	-0.00409375	-0.00302944	0.0672119
29	bd	drought	Control	-0.161562	-0.000640625	-0.000480639	0.406499
30	be	drought	Control	0.116576	0.00053125	0.000939142	0.0514711
31	bf	drought	Control	-0.462791	-0.00184375	-0.00161639	0.02543
32	bg	drought	Control	-0.276961	-0.00125	-0.00130757	0.0419969
33	bh	drought	Control	-0.258217	-0.000765625	-0.00097594	0.136247
34	bi	drought	Control	0.213514	0.0008125	0.000200747	0.128071
35	bj	drought	Control	0.00737953	1.5625e-05	0.00246932	0.437241
36	bk	drought	Control	-0.204931	-0.00090625	-0.000630152	0.0625326
37	bl	drought	Control	-0.162057	-0.00159375	-0.00140183	0.0100117
38	bm	drought	Control	-0.817886	-0.00185937	-0.00194248	0.000501199
39	bn	drought	Control	0.272526	0.000328125	0.000337636	0.0527247
40	bo	drought	Control	0.538669	0.000671875	0.000959409	0.00225369
41	bp	drought	Control	0.394279	0.0006875	0.000893795	8.95639e-05
42	bq	drought	Control	-0.520832	-0.0003125	-0.000316519	0.00749896
43	br	drought	Control	-0.301656	-0.0003125	-0.000412477	0.130671
44	bs	drought	Control	-1.0156	-0.000734375	-0.000609205	0.000283245
45	bt	drought	Control	-0.222392	-7.8125e-05	-0.000192991	0.316683
46	bu	drought	Control	0.314109	0.00028125	-0.00022945	0.616853
47	bv	drought	Control	0.483424	0.000640625	0.000424253	0.0186453
48	bw	drought	Control	#NAME?	-0.0001875	-0.000129416	0.00550651
49	bx	drought	Control	0.898717	0.000796875	0.000795007	1.15079e-06
50	by	drought	Control	0.619728	0.0006875	0.000707031	6.56791e-05
51	bz	drought	Control	-1.80735	-0.000234375	-0.000183028	0.000235823
52	ca	drought	Control	0.125531	3.125e-05	0.000111017	0.0896161
53	cb	drought	Control	#NAME?	-0.00021875	-0.000361583	0.0163967
54	cc	drought	Control	0	0	-0.00025	0.0234302
55	cd	drought	Control	-0.722466	-0.000203125	-0.00022945	0.00205345
56	ce	drought	Control	0	0	-5.65557e-05	0.0469341
57	cf	drought	Control	0	0	-9.5505e-05	0.0629141
58	cg	drought	Control	-0.338802	-0.000140625	-0.000190727	0.147425
59	ch	drought	Control	2	0.000140625	0.000158118	0.000439869
60	ci	drought	Control	-0.459432	-4.6875e-05	-7.12183e-05	0.0935609
61	cj	drought	Control	#NAME?	-0.00028125	-0.000188179	0.0003831
62	ck	drought	Control	Inf	0.000125	0.000114244	0.00331942
63	cl	drought	Control	-2.16993	-0.000109375	-9.72034e-05	0.00643382
64	cm	drought	Control	0.63743	7.8125e-05	7.90874e-05	0.0473691
65	cn	drought	Control	Inf	9.375e-05	7.49547e-05	0.0368703
66	co	drought	Control	0	0	8.45222e-05	0.00186033
67	cp	drought	Control	0	0	-5.03284e-05	0.00885772
68	cq	drought	Control	0	0	-7.94271e-05	0.0234302
69	cr	drought	Control	0	0	3.96852e-05	0.0111291
70	cs	drought	Control	#NAME?	-3.125e-05	2.5702e-05	0.682635
71	ct	drought	Control	Inf	0.00015625	0.000163893	2.29766e-05
72	cu	drought	Control	Inf	9.375e-05	5.72351e-05	0.0268363
73	cv	drought	Control	2.58496	7.8125e-05	7.37659e-05	0.0833285
74	cw	drought	Control	0	0	-5.1404e-05	0.0917322
75	cx	drought	Control	0	0	3.28918e-05	0.0455777
76	cy	drought	Control	0	0	-3.25521e-05	0.00292616
77	cz	drought	Control	0	0	-1.95313e-05	0.0119032
78	da	drought	Control	0	0	1.3587e-05	0.00408047
79	db	drought	Control	0	0	3.53261e-05	0.0179937
80	dc	drought	Control	-0.0268909	-0.000515625	-0.000618886	0.59467
81	dd	drought	Control	-0.398866	-0.003125	-0.00268297	0.094793
82	de	drought	Control	-0.161562	-0.000640625	-0.000480639	0.406499
83	df	drought	Control	0.26096	0.00071875	0.000570822	0.00830083
84	dg	drought	Control	-0.989598	-0.00535938	-0.00391146	0.0127692
85	dh	drought	Control	-0.903785	-0.00253125	-0.00171733	0.0143793
86	di	drought	Control	-1.44846	-0.00259375	-0.00272311	0.000284631
87	dj	drought	Control	-0.462526	-0.0015	-0.0010779	0.045414
88	dk	drought	Control	-0.423808	-0.000875	-0.000674706	0.130782
89	dl	drought	Control	0.32681	0.00046875	0.000623019	0.00391871
90	dm	drought	Control	0.00737953	1.5625e-05	0.00246932	0.437241
91	dn	drought	Control	-0.132974	-0.0004375	-0.000383548	0.19414
92	do	drought	Control	0.0460285	0.000203125	0.000279382	0.594584
93	dp	drought	Control	-0.817886	-0.00185937	-0.00194248	0.000501199
94	dq	drought	Control	0.272526	0.000328125	0.000337636	0.0527247
95	dr	drought	Control	0.538669	0.000671875	0.000959409	0.00225369
96	ds	drought	Control	-0.073249	-7.8125e-05	-0.000246603	0.348784
97	dt	drought	Control	-0.557218	-0.000515625	-0.000482394	0.00107941
98	du	drought	Control	-0.185355	-0.000265625	-0.000162194	0.224967
99	dv	drought	Control	-0.799701	-0.000625	-0.000464617	0.00511598
100	dw	drought	Control	0.394279	0.0006875	0.000893795	8.95639e-05
101	dx	drought	Control	-0.338802	-0.0005625	-0.000320596	0.153767
102	dy	drought	Control	-0.342392	-0.000234375	-0.000220562	0.14176
103	dz	drought	Control	0.271302	0.0001875	2.32111e-06	0.601598
104	ea	drought	Control	-0.520832	-0.0003125	-0.000316519	0.00749896
105	eb	drought	Control	-0.359896	-0.00053125	-0.000745245	0.0214979
106	ec	drought	Control	-0.301656	-0.0003125	-0.000412477	0.130671
107	ed	drought	Control	-0.184425	-0.0001875	-0.000455163	0.1834
108	ee	drought	Control	-1.0156	-0.000734375	-0.000609205	0.000283245
109	ef	drought	Control	-0.0911479	-4.6875e-05	-9.81658e-05	0.342578
110	eg	drought	Control	-0.222392	-7.8125e-05	-0.000192991	0.316683
111	eh	drought	Control	-0.321928	-0.000140625	-0.000117867	0.449706
112	ei	drought	Control	-0.36257	-0.000125	-7.78986e-05	0.165962
113	ej	drought	Control	0.314109	0.00028125	-0.00022945	0.616853
114	ek	drought	Control	-0.485427	-0.0001875	-0.000155005	0.0419375
115	el	drought	Control	0.736966	0.000375	9.86187e-05	0.364737
116	em	drought	Control	#NAME?	-0.000203125	-0.000221864	0.00509182
117	en	drought	Control	0.37707	0.000359375	-0.000466429	0.678054
118	eo	drought	Control	-0.722466	-0.000203125	-0.000193897	0.00617716
119	ep	drought	Control	0.643856	0.0005625	0.000579257	0.000307906
120	eq	drought	Control	#NAME?	-0.0001875	-0.000129416	0.00550651
121	er	drought	Control	-3.20343e-16	-5.42101e-20	1.4606e-05	0.638705
122	es	drought	Control	0.678072	0.000140625	0.000127548	0.224484
123	et	drought	Control	0.203533	7.8125e-05	0.000222486	0.0451334
124	eu	drought	Control	0.146841	9.375e-05	9.024e-05	0.550991
125	ev	drought	Control	-0.584963	-0.000125	-0.000130322	0.0136631
126	ew	drought	Control	-0.82103	-0.000359375	-0.000447803	0.0655043
127	ex	drought	Control	1.12553	0.000203125	0.000146569	0.0067292
128	ey	drought	Control	Inf	0.000375	0.000688915	0.000534333
129	ez	drought	Control	#NAME?	-7.8125e-05	-8.75226e-05	0.00321905
130	fa	drought	Control	0.125531	3.125e-05	0.000111017	0.0896161
131	fb	drought	Control	1.36257	0.000515625	0.000528589	4.73376e-05
132	fc	drought	Control	0.347923	9.375e-05	5.16304e-05	0.258666
133	fd	drought	Control	#NAME?	-0.00021875	-0.000361583	0.0163967
134	fe	drought	Control	Inf	0.00021875	0.000294214	0.000212007
135	ff	drought	Control	-1.22239	-0.000125	-9.5505e-05	0.0113142
136	fg	drought	Control	0	0	-0.00025	0.0234302
137	fh	drought	Control	-0.722466	-0.000203125	-0.00022945	0.00205345
138	fi	drought	Control	0	0	-5.65557e-05	0.0469341
139	fj	drought	Control	1.37851	0.00025	0.000217448	0.000314918
140	fk	drought	Control	0	0	-9.5505e-05	0.0629141
141	fl	drought	Control	0.0614005	1.5625e-05	-7.47849e-05	0.668616
142	fm	drought	Control	-0.338802	-0.000140625	-0.000190727	0.147425
143	fn	drought	Control	2	0.000140625	0.000158118	0.000439869
144	fo	drought	Control	-0.137504	-1.5625e-05	4.39312e-05	0.585071
145	fp	drought	Control	-0.459432	-4.6875e-05	-7.12183e-05	0.0935609
146	fq	drought	Control	#NAME?	-0.00028125	-0.000188179	0.0003831
147	fr	drought	Control	Inf	0.000125	0.000114244	0.00331942
148	fs	drought	Control	1.62803	0.000359375	0.000399343	8.21073e-05
149	ft	drought	Control	-2.16993	-0.000109375	-9.72034e-05	0.00643382
150	fu	drought	Control	0.63743	7.8125e-05	7.90874e-05	0.0473691
151	fv	drought	Control	Inf	9.375e-05	7.49547e-05	0.0368703
152	fw	drought	Control	Inf	0.0001875	0.00012483	0.00556503
153	fx	drought	Control	0	0	8.45222e-05	0.00186033
154	fy	drought	Control	0	0	0.000278589	0.0162921
155	fz	drought	Control	0	0	2.72871e-05	0.361812
156	ga	drought	Control	0	0	-5.03284e-05	0.00885772
157	gb	drought	Control	0	0	-7.94271e-05	0.0234302
158	gc	drought	Control	0	0	7.68229e-05	0.0383321
159	gd	drought	Control	0	0	3.96852e-05	0.0111291
160	ge	drought	Control	0	0	6.56703e-05	0.153989
161	gf	drought	Control	0	0	-4.75543e-05	0.12183
162	gg	drought	Control	Inf	0.00015625	0.000163893	2.29766e-05
163	gh	drought	Control	Inf	9.375e-05	5.72351e-05	0.0268363
164	gi	drought	Control	0	0	-4.01947e-05	0.0310002
165	gj	drought	Control	0	0	-5.1404e-05	0.0917322
166	gk	drought	Control	0	0	3.28918e-05	0.0455777
167	gl	drought	Control	Inf	6.25e-05	8.14085e-05	0.0137783
168	gm	drought	Control	#NAME?	-1.5625e-05	-3.99683e-05	0.00331424
169	gn	drought	Control	Inf	9.375e-05	0.000113961	0.0026797
170	go	drought	Control	0	0	-5.33854e-05	0.00292233
171	gp	drought	Control	0	0	-3.25521e-05	0.00292616
172	gq	drought	Control	0	0	5.70652e-05	0.00190791
173	gr	drought	Control	0	0	6.79348e-06	0.0366609
174	gs	drought	Control	0	0	1.90784e-05	0.0317279
175	gt	drought	Control	0	0	1.22283e-05	0.0367305
176	gu	drought	Control	0	0	5.16304e-05	0.0179937
177	gv	drought	Control	0	0	-1.95313e-05	0.0119032
178	gw	drought	Control	0	0	1.3587e-05	0.00408047
179	gx	drought	Control	0	0	3.53261e-05	0.0179937
180	gy	drought	Control	0	0	1.22283e-05	0.0178778
181	gz	drought	Control	0.309104	0.00253125	0.00229235	0.00857859
182	ha	drought	Control	-0.398866	-0.003125	-0.00272549	0.0926991
183	hb	drought	Control	-0.161562	-0.000640625	-0.000480639	0.406499
184	hc	drought	Control	0.265142	0.00071875	0.000536458	0.00940397
185	hd	drought	Control	-0.989598	-0.00535938	-0.00391146	0.0127692
186	he	drought	Control	-0.197037	-0.001875	-0.00213394	0.0171416
187	hf	drought	Control	-0.903785	-0.00253125	-0.00171733	0.0143793
188	hg	drought	Control	-1.44846	-0.00259375	-0.00272311	0.000284631
189	hh	drought	Control	-0.29589	-0.000875	-0.00131482	0.0171352
190	hi	drought	Control	-0.423808	-0.000875	-0.000674706	0.130782
191	hj	drought	Control	0.363963	0.000515625	0.000551234	0.0135302
192	hk	drought	Control	0.00737953	1.5625e-05	0.00246932	0.437241
193	hl	drought	Control	-0.405639	-0.00078125	-0.000645947	0.0166428
194	hm	drought	Control	0.388271	0.00065625	0.000821558	0.00020372
195	hn	drought	Control	-0.817886	-0.00185937	-0.00194248	0.000501199
196	ho	drought	Control	0.272526	0.000328125	0.000337636	0.0527247
197	hp	drought	Control	0.538669	0.000671875	0.000959409	0.00225369
198	hq	drought	Control	-0.073249	-7.8125e-05	-0.000246603	0.348784
199	hr	drought	Control	-0.253757	-0.0003125	-0.000266757	0.0233065
200	hs	drought	Control	-0.557218	-0.000515625	-0.000482394	0.00107941
201	ht	drought	Control	-0.472068	-0.000375	-0.000325068	0.0350347
202	hu	drought	Control	-0.185355	-0.000265625	-0.000162194	0.224967
203	hv	drought	Control	-0.649093	-0.000390625	-0.000338768	0.0202932
204	hw	drought	Control	0.394279	0.0006875	0.000893795	8.95639e-05
205	hx	drought	Control	-0.612184	-0.000578125	-0.000620471	0.00169258
206	hy	drought	Control	-0.342392	-0.000234375	-0.000220562	0.14176
207	hz	drought	Control	0.271302	0.0001875	2.32111e-06	0.601598
208	ia	drought	Control	-0.520832	-0.0003125	-0.000316519	0.00749896
209	ib	drought	Control	-0.359896	-0.00053125	-0.000745245	0.0214979
210	ic	drought	Control	-0.301656	-0.0003125	-0.000412477	0.130671
211	id	drought	Control	-0.321928	-0.0003125	-0.000567708	0.0514374
212	ie	drought	Control	0.302927	0.000390625	0.000262398	0.24602
213	if	drought	Control	-0.920566	-0.00078125	-0.000777287	0.000519537
214	ig	drought	Control	-1.0156	-0.000734375	-0.000609205	0.000283245
215	ih	drought	Control	-0.0911479	-4.6875e-05	-9.81658e-05	0.342578
216	ii	drought	Control	-0.222392	-7.8125e-05	-0.000192991	0.316683
217	ij	drought	Control	-0.70044	-0.000234375	-0.000255208	0.0290182
218	ik	drought	Control	-0.36257	-0.000125	-7.78986e-05	0.165962
219	il	drought	Control	0.314109	0.00028125	-0.00022945	0.616853
220	im	drought	Control	-0.77259	-0.000265625	-0.000215353	0.00305931
221	in	drought	Control	0.327575	0.000203125	0.000203408	0.0232825
222	io	drought	Control	0.736966	0.000375	9.86187e-05	0.364737
223	ip	drought	Control	#NAME?	-0.000203125	-0.000221864	0.00509182
224	iq	drought	Control	1.32193	0.00084375	0.000540138	0.00511341
225	ir	drought	Control	-0.722466	-0.000203125	-0.000193897	0.00617716
226	is	drought	Control	0.545434	0.000265625	0.000349808	0.00353805
227	it	drought	Control	#NAME?	-0.0001875	-0.000129416	0.00550651
228	iu	drought	Control	-3.20343e-16	-5.42101e-20	1.4606e-05	0.638705
229	iv	drought	Control	0.275634	0.000125	0.00022945	0.0499442
230	iw	drought	Control	0.830075	0.000109375	0.000184896	0.0406548
231	ix	drought	Control	0.203533	7.8125e-05	0.000222486	0.0451334
232	iy	drought	Control	0.146841	9.375e-05	9.024e-05	0.550991
233	iz	drought	Control	-0.584963	-0.000125	-0.000130322	0.0136631
234	ja	drought	Control	0.383329	0.000109375	0.000140455	0.0303963
235	jb	drought	Control	#NAME?	-0.000109375	-0.000166384	0.180475
236	jc	drought	Control	1.12553	0.000203125	0.000146569	0.0067292
237	jd	drought	Control	Inf	0.000375	0.000688915	0.000534333
238	je	drought	Control	#NAME?	-7.8125e-05	-8.75226e-05	0.00321905
239	jf	drought	Control	0.125531	3.125e-05	0.000111017	0.0896161
240	jg	drought	Control	-0.415037	-9.375e-05	-0.00011798	0.0143652
241	jh	drought	Control	-0.115477	-1.5625e-05	0.000236923	0.357461
242	ji	drought	Control	0	0	-0.00100657	0.0569679
243	jj	drought	Control	1.36257	0.000515625	0.000528589	4.73376e-05
244	jk	drought	Control	Inf	9.375e-05	6.1764e-05	0.0301585
245	jl	drought	Control	Inf	0.00021875	0.000127548	0.0176819
246	jm	drought	Control	#NAME?	-0.00025	-0.000509567	0.0235857
247	jn	drought	Control	#NAME?	-0.00021875	-0.000361583	0.0163967
248	jo	drought	Control	Inf	0.00021875	0.000294214	0.000212007
249	jp	drought	Control	-1.22239	-0.000125	-9.5505e-05	0.0113142
250	jq	drought	Control	Inf	0.0001875	0.000112545	0.00590859
251	jr	drought	Control	0	0	-0.00025	0.0234302
252	js	drought	Control	-0.643856	-0.000140625	-0.000142097	0.0132824
253	jt	drought	Control	-0.584963	-6.25e-05	-0.000125849	0.145281
254	ju	drought	Control	0	0	-5.65557e-05	0.0469341
255	jv	drought	Control	2	0.00028125	0.000255265	1.633e-05
256	jw	drought	Control	0	0	-9.5505e-05	0.0629141
257	jx	drought	Control	#NAME?	-1.5625e-05	-0.000139549	0.0399374
258	jy	drought	Control	Inf	0.0001875	0.000137341	0.0267526
259	jz	drought	Control	-0.338802	-0.000140625	-0.000190727	0.147425
260	ka	drought	Control	#NAME?	-0.000125	-8.48053e-05	0.070215
261	kb	drought	Control	2	9.375e-05	0.000103544	0.0017568
262	kc	drought	Control	-0.137504	-1.5625e-05	4.39312e-05	0.585071
263	kd	drought	Control	-0.459432	-4.6875e-05	-7.12183e-05	0.0935609
264	ke	drought	Control	#NAME?	-0.00028125	-0.000188179	0.0003831
265	kf	drought	Control	0	0	0.00014957	0.0617583
266	kg	drought	Control	#NAME?	-9.375e-05	-8.73528e-05	0.0143779
267	kh	drought	Control	-1.80735	-7.8125e-05	-5.73483e-05	0.0132204
268	ki	drought	Control	Inf	0.000125	0.000114244	0.00331942
269	kj	drought	Control	1.62803	0.000359375	0.000399343	8.21073e-05
270	kk	drought	Control	-2.16993	-0.000109375	-9.72034e-05	0.00643382
271	kl	drought	Control	0.63743	7.8125e-05	7.90874e-05	0.0473691
272	km	drought	Control	Inf	9.375e-05	7.49547e-05	0.0368703
273	kn	drought	Control	-0.847997	-0.000125	-0.000101789	0.218445
274	ko	drought	Control	Inf	0.0001875	0.00012483	0.00556503
275	kp	drought	Control	0	0	8.45222e-05	0.00186033
276	kq	drought	Control	1	9.375e-05	0.000166384	0.312045
277	kr	drought	Control	0	0	0.000278589	0.0162921
278	ks	drought	Control	0	0	5.07246e-05	0.0115464
279	kt	drought	Control	0	0	-5.03284e-05	0.00885772
280	ku	drought	Control	0	0	7.17844e-05	0.11632
281	kv	drought	Control	0	0	3.43637e-05	0.0310667
282	kw	drought	Control	0	0	-7.94271e-05	0.0234302
283	kx	drought	Control	0	0	7.68229e-05	0.0383321
284	ky	drought	Control	#NAME?	-3.125e-05	-3.7817e-05	0.0908759
285	kz	drought	Control	0	0	3.96852e-05	0.0111291
286	la	drought	Control	0	0	6.56703e-05	0.153989
287	lb	drought	Control	0	0	4.25159e-05	0.0476809
288	lc	drought	Control	0	0	-2.34375e-05	0.00293
289	ld	drought	Control	0	0	-4.75543e-05	0.12183
290	le	drought	Control	Inf	0.00015625	0.000144871	0.000177869
291	lf	drought	Control	Inf	9.375e-05	5.72351e-05	0.0268363
292	lg	drought	Control	0	0	9.64674e-05	0.0179937
293	lh	drought	Control	0	0	-4.01947e-05	0.0310002
294	li	drought	Control	0	0	-5.1404e-05	0.0917322
295	lj	drought	Control	0	0	3.28918e-05	0.0455777
296	lk	drought	Control	Inf	6.25e-05	8.14085e-05	0.0137783
297	ll	drought	Control	#NAME?	-1.5625e-05	-3.99683e-05	0.00331424
298	lm	drought	Control	Inf	9.375e-05	0.000113961	0.0026797
299	ln	drought	Control	0	0	6.03487e-05	0.0825593
300	lo	drought	Control	0	0	-5.33854e-05	0.00292233
301	lp	drought	Control	0	0	-3.25521e-05	0.00292616
302	lq	drought	Control	0	0	1.90217e-05	0.0367537
303	lr	drought	Control	0	0	2.17391e-05	0.0367305
304	ls	drought	Control	0	0	6.79348e-06	0.0366609
305	lt	drought	Control	0	0	1.90784e-05	0.0317279
306	lu	drought	Control	0	0	1.22283e-05	0.0367305
307	lv	drought	Control	0	0	5.45743e-05	0.172588
308	lw	drought	Control	0	0	2.58718e-05	0.0637896
309	lx	drought	Control	0	0	3.53261e-05	0.0367537
310	ly	drought	Control	0	0	2.71739e-05	0.0367537
311	lz	drought	Control	0	0	5.16304e-05	0.0179937
312	ma	drought	Control	0	0	-1.95313e-05	0.0119032
313	mb	drought	Control	0	0	1.3587e-05	0.00408047
314	mc	drought	Control	0	0	3.53261e-05	0.0179937
315	md	drought	Control	0	0	1.22283e-05	0.0178778
316	me	drought	Control	0.335603	0.00171875	0.00135196	0.0291439
317	mf	drought	Control	-0.506591	-0.0038125	-0.00295313	0.062173
318	mg	drought	Control	0.390584	0.000578125	0.000689651	0.00777968
319	mh	drought	Control	-0.161562	-0.000640625	-0.000480639	0.406499
320	mi	drought	Control	0.265142	0.00071875	0.000536458	0.00940397
321	mj	drought	Control	-0.989598	-0.00535938	-0.00391146	0.0127692
322	mk	drought	Control	0.349942	0.000875	0.00122843	0.0148124
323	ml	drought	Control	-0.903785	-0.00253125	-0.00175402	0.0120196
324	mm	drought	Control	-0.377563	-0.00109375	-0.00106697	0.0152599
325	mn	drought	Control	-1.44846	-0.00259375	-0.00272311	0.000284631
326	mo	drought	Control	-0.29589	-0.000875	-0.00131482	0.0171352
327	mp	drought	Control	-0.506591	-0.00190625	-0.00236606	0.00034958
328	mq	drought	Control	-0.423808	-0.000875	-0.000674706	0.130782
329	mr	drought	Control	0.363963	0.000515625	0.000551234	0.0135302
330	ms	drought	Control	0.00737953	1.5625e-05	0.00246932	0.437241
331	mt	drought	Control	-0.540568	-0.00078125	-0.000779778	0.00258626
332	mu	drought	Control	0.470891	0.0006875	0.000591146	0.00241682
333	mv	drought	Control	-0.817886	-0.00185937	-0.00194248	0.000501199
334	mw	drought	Control	0.272526	0.000328125	0.000337636	0.0527247
335	mx	drought	Control	0.538669	0.000671875	0.000959409	0.00225369
336	my	drought	Control	-0.073249	-7.8125e-05	-0.000246603	0.348784
337	mz	drought	Control	-0.253757	-0.0003125	-0.000289855	0.0191404
338	na	drought	Control	-0.557218	-0.000515625	-0.000482394	0.00107941
339	nb	drought	Control	-0.472068	-0.000375	-0.000325068	0.0350347
340	nc	drought	Control	-0.607683	-0.00034375	-0.00040993	0.0465039
341	nd	drought	Control	-0.185355	-0.000265625	-0.000162194	0.224967
342	ne	drought	Control	-0.649093	-0.000390625	-0.000363225	0.0161167
343	nf	drought	Control	0.669851	0.00040625	0.000565557	0.00619845
344	ng	drought	Control	0.394279	0.0006875	0.000893795	8.95639e-05
345	nh	drought	Control	-0.612184	-0.000578125	-0.000620471	0.00169258
346	ni	drought	Control	-0.342392	-0.000234375	-0.000220562	0.14176
347	nj	drought	Control	0.271302	0.0001875	2.32111e-06	0.601598
348	nk	drought	Control	-0.520832	-0.0003125	-0.000316519	0.00749896
349	nl	drought	Control	-2	-0.00103125	-0.00110796	0.000205023
350	nm	drought	Control	0.736966	0.00025	0.000204993	0.00767328
351	nn	drought	Control	-0.599462	-0.00053125	-0.0006738	0.0119825
352	no	drought	Control	0.302927	0.000390625	0.000262398	0.24602
353	np	drought	Control	-0.920566	-0.00078125	-0.000777287	0.000519537
354	nq	drought	Control	-1.0156	-0.000734375	-0.000609205	0.000283245
355	nr	drought	Control	-0.0310269	-1.5625e-05	-0.000151551	0.168909
356	ns	drought	Control	0.241008	0.000125	0.000133832	0.084322
357	nt	drought	Control	-0.222392	-7.8125e-05	-0.000192991	0.316683
358	nu	drought	Control	-0.70044	-0.000234375	-0.000255208	0.0290182
359	nv	drought	Control	-0.36257	-0.000125	-7.78986e-05	0.165962
360	nw	drought	Control	0.314109	0.00028125	-0.00022945	0.616853
361	nx	drought	Control	-0.77259	-0.000265625	-0.000215353	0.00305931
362	ny	drought	Control	0.865699	0.000578125	0.000411402	0.00685445
363	nz	drought	Control	0.38529	0.000234375	0.000306103	0.00432259
364	oa	drought	Control	Inf	0.00065625	0.00031635	0.0106319
365	ob	drought	Control	0.719892	0.000171875	0.000230412	0.0180385
366	oc	drought	Control	#NAME?	-0.000203125	-0.000221864	0.00509182
367	od	drought	Control	1.32193	0.00084375	0.000540138	0.00511341
368	oe	drought	Control	-0.722466	-0.000203125	-0.000193897	0.00617716
369	of	drought	Control	0.505235	0.000203125	0.000224355	0.0660818
370	og	drought	Control	-1.18763	-0.00071875	-0.000912364	0.000320783
371	oh	drought	Control	Inf	0.00028125	0.000294894	9.77251e-05
372	oi	drought	Control	#NAME?	-0.0001875	-0.000129416	0.00550651
373	oj	drought	Control	0.584963	9.375e-05	0.000145947	0.00798242
374	ok	drought	Control	0.275634	0.000125	0.00022945	0.0499442
375	ol	drought	Control	0.830075	0.000109375	0.000184896	0.0406548
376	om	drought	Control	0.203533	7.8125e-05	0.000222486	0.0451334
377	on	drought	Control	-0.857981	-0.000203125	-0.000217731	0.0131395
378	oo	drought	Control	0.0703893	3.125e-05	-3.06273e-05	0.822965
379	op	drought	Control	-0.584963	-0.000125	-0.000130322	0.0136631
380	oq	drought	Control	0.383329	0.000109375	0.000140455	0.0303963
381	or	drought	Control	#NAME?	-0.000109375	-0.000166384	0.180475
382	os	drought	Control	1.12553	0.000203125	0.000146569	0.0067292
383	ot	drought	Control	Inf	0.000375	0.000688915	0.000534333
384	ou	drought	Control	#NAME?	-7.8125e-05	-8.75226e-05	0.00321905
385	ov	drought	Control	0.125531	3.125e-05	0.000111017	0.0896161
386	ow	drought	Control	-0.415037	-9.375e-05	-0.00011798	0.0143652
387	ox	drought	Control	-0.115477	-1.5625e-05	0.000236923	0.357461
388	oy	drought	Control	0	0	-0.00030214	0.0569679
389	oz	drought	Control	1.36257	0.000515625	0.000528589	4.73376e-05
390	pa	drought	Control	Inf	9.375e-05	6.1764e-05	0.0301585
391	pb	drought	Control	Inf	0.00021875	0.000127548	0.0176819
392	pc	drought	Control	#NAME?	-0.00025	-0.000509567	0.0235857
393	pd	drought	Control	#NAME?	-0.000203125	-0.00038202	0.000521957
394	pe	drought	Control	0	0	0.000185971	0.00725638
395	pf	drought	Control	-1.22239	-0.000125	-9.5505e-05	0.0113142
396	pg	drought	Control	Inf	0.0001875	0.000112545	0.00590859
397	ph	drought	Control	0	0	-0.00025	0.0234302
398	pi	drought	Control	-0.643856	-0.000140625	-0.000142097	0.0132824
399	pj	drought	Control	-0.584963	-6.25e-05	-0.000125849	0.145281
400	pk	drought	Control	#NAME?	-4.6875e-05	-0.000131341	0.00746441
401	pl	drought	Control	0	0	-5.65557e-05	0.0469341
402	pm	drought	Control	0	0	-0.000704427	0.0119397
403	pn	drought	Control	2	0.00028125	0.000255265	1.633e-05
404	po	drought	Control	0	0	-9.5505e-05	0.0629141
405	pp	drought	Control	#NAME?	-1.5625e-05	-0.000139549	0.0399374
406	pq	drought	Control	Inf	0.0001875	0.000137341	0.0267526
407	pr	drought	Control	-0.415037	-0.00015625	-0.000248075	0.0551898
408	ps	drought	Control	#NAME?	-0.000125	-8.48053e-05	0.070215
409	pt	drought	Control	-0.321928	-4.6875e-05	-5.64425e-05	0.381064
410	pu	drought	Control	2	9.375e-05	0.000103544	0.0017568
411	pv	drought	Control	Inf	0.00034375	0.000227638	0.00606888
412	pw	drought	Control	-0.137504	-1.5625e-05	4.39312e-05	0.585071
413	px	drought	Control	-0.459432	-4.6875e-05	-7.12183e-05	0.0935609
414	py	drought	Control	#NAME?	-0.00028125	-0.000188179	0.0003831
415	pz	drought	Control	0	0	0.00014957	0.0617583
416	qa	drought	Control	#NAME?	-9.375e-05	-8.73528e-05	0.0143779
417	qb	drought	Control	-1.80735	-7.8125e-05	-5.73483e-05	0.0132204
418	qc	drought	Control	Inf	0.000125	0.000114244	0.00331942
419	qd	drought	Control	Inf	0.000125	0.000137228	0.0583557
420	qe	drought	Control	-2.16993	-0.000109375	-9.72034e-05	0.00643382
421	qf	drought	Control	0.63743	7.8125e-05	7.90874e-05	0.0473691
422	qg	drought	Control	0	0	0.000108243	0.00285507
423	qh	drought	Control	Inf	9.375e-05	7.49547e-05	0.0368703
424	qi	drought	Control	-0.847997	-0.000125	-0.000101789	0.218445
425	qj	drought	Control	0	0	7.06522e-05	0.0179473
426	qk	drought	Control	Inf	0.0001875	0.00012483	0.00556503
427	ql	drought	Control	0	0	8.45222e-05	0.00186033
428	qm	drought	Control	1.65208	0.000234375	0.000262115	0.00016461
429	qn	drought	Control	0	0	-4.86866e-05	0.0102952
430	qo	drought	Control	Inf	9.375e-05	0.000262285	0.00648544
431	qp	drought	Control	0	0	0.000278589	0.0162921
432	qq	drought	Control	0	0	5.07246e-05	0.0115464
433	qr	drought	Control	Inf	0.0001875	0.00017731	0.00401176
434	qs	drought	Control	0	0	-5.03284e-05	0.00885772
435	qt	drought	Control	#NAME?	-6.25e-05	-9.59013e-05	0.012831
436	qu	drought	Control	0	0	-0.000102695	0.0409122
437	qv	drought	Control	0	0	7.17844e-05	0.11632
438	qw	drought	Control	Inf	3.125e-05	0.000125453	0.014303
439	qx	drought	Control	0	0	3.43637e-05	0.0310667
440	qy	drought	Control	0	0	9.51087e-05	0.0179937
441	qz	drought	Control	0	0	2.44565e-05	0.0367537
442	ra	drought	Control	0	0	-7.94271e-05	0.0234302
443	rb	drought	Control	0	0	7.68229e-05	0.0383321
444	rc	drought	Control	#NAME?	-3.125e-05	-3.7817e-05	0.0908759
445	rd	drought	Control	0	0	3.96852e-05	0.0111291
446	re	drought	Control	0	0	6.56703e-05	0.153989
447	rf	drought	Control	0	0	4.25159e-05	0.0476809
448	rg	drought	Control	0	0	-2.34375e-05	0.00293
449	rh	drought	Control	0	0	-4.75543e-05	0.12183
450	ri	drought	Control	Inf	0.00015625	0.000144871	0.000177869
451	rj	drought	Control	Inf	9.375e-05	5.72351e-05	0.0268363
452	rk	drought	Control	0	0	9.64674e-05	0.0179937
453	rl	drought	Control	0	0	-4.01947e-05	0.0310002
454	rm	drought	Control	Inf	6.25e-05	5.73483e-05	0.0284821
455	rn	drought	Control	0	0	-5.1404e-05	0.0917322
456	ro	drought	Control	0	0	3.28918e-05	0.0455777
457	rp	drought	Control	Inf	6.25e-05	8.14085e-05	0.0137783
458	rq	drought	Control	#NAME?	-1.5625e-05	-3.99683e-05	0.00331424
459	rr	drought	Control	0	0	5.33854e-05	0.0360859
460	rs	drought	Control	Inf	9.375e-05	0.000113961	0.0026797
461	rt	drought	Control	0	0	6.03487e-05	0.0825593
462	ru	drought	Control	0	0	-5.33854e-05	0.00292233
463	rv	drought	Control	0	0	2.0437e-05	0.0330924
464	rw	drought	Control	0	0	-3.25521e-05	0.00292616
465	rx	drought	Control	0	0	1.90217e-05	0.0367537
466	ry	drought	Control	0	0	2.17391e-05	0.0367305
467	rz	drought	Control	0	0	6.79348e-06	0.0366609
468	sa	drought	Control	0	0	1.90784e-05	0.0317279
469	sb	drought	Control	0	0	1.22283e-05	0.0367305
470	sc	drought	Control	0	0	0.000106091	0.000515512
471	sd	drought	Control	0	0	5.45743e-05	0.172588
472	se	drought	Control	0	0	2.58718e-05	0.0637896
473	sf	drought	Control	0	0	3.53261e-05	0.0367537
474	sg	drought	Control	0	0	2.30978e-05	0.0367305
475	sh	drought	Control	0	0	3.66848e-05	0.0367305
476	si	drought	Control	0	0	2.71739e-05	0.0367537
477	sj	drought	Control	0	0	5.16304e-05	0.0179937
478	sk	drought	Control	0	0	-1.95313e-05	0.0119032
479	sl	drought	Control	0	0	1.3587e-05	0.00408047
480	sm	drought	Control	0	0	3.53261e-05	0.0179937
481	sn	drought	Control	0	0	1.22283e-05	0.0178778

## Sheet: 7_LMM_Shannon_sampling
7-Output of emmeans for microbial Shannon diversity across each sampling period
Number	Sampling period	Functional Diversity	emmean	SE	df	lower.CL	upper.CL	group
8	Control_2019	low	659263279027193	308361350212083	174	650727673323852	667798884730534	c
15	Control_2019	high	668401476060103	308361350212084	174	659865870356762	676937081763444	abcd
1	Control_2020	low	680805468949155	308361350212084	174	672269863245814	689341074652496	ab
11	Control_2020	high	671608425534734	308361350212084	174	663072819831393	680144031238075	abc
7	Control_Pre_drought_2019	low	661737655033507	308361350212084	174	653202049330166	670273260736848	c
14	Control_Pre_drought_2019	high	662674472740809	308361350212084	174	654138867037468	67121007844415	cd
4	Control_Pre_drought_2020	low	668527783692042	308361350212084	174	659992177988701	677063389395383	bc
12	Control_Pre_drought_2020	high	675286852815691	308361350212084	174	66675124711235	683822458519032	abc
5	Drought_2019	low	664935023048871	322072926193522	174	656019873650873	673850172446869	c
13	Drought_2019	high	664653282299114	308361350212083	174	656117676595773	673188888002455	bcd
3	Drought_2020	low	684009692300492	308361350212084	174	675474086597151	692545298003833	a
10	Drought_2020	high	680777169118968	308361350212084	174	672241563415627	689312774822309	a
6	Drought_Pre_drought_2019	low	659918684926796	308361350212085	174	651383079223455	668454290630137	c
16	Drought_Pre_drought_2019	high	655269880019222	308361350212084	174	646734274315881	663805485722563	d
2	Drought_Pre_drought_2020	low	681337043107817	322072926193522	174	672421893709818	690252192505815	ab
9	Drought_Pre_drought_2020	high	676399296934148	308361350212084	174	667863691230807	684934902637489	ab

## Sheet: 8_LMM_Shannon_diversity
8-Output of emmeans for microbial Shannon diversity related to macrofauna functional diverisity
Number	Functional_Diversity	Sampling period	emmean	SE	df	lower.CL	upper.CL	group
1	high	Control_Pre_drought_2019	6626744727	30836135	174	6557025313	6696464142	a
2	low	Control_Pre_drought_2019	661737655	30836135	174	6547657136	6687095964	a
4	low	Drought_Pre_drought_2019	6599186849	30836135	174	6529467435	6668906263	a
3	high	Drought_Pre_drought_2019	65526988	30836135	174	6482979386	6622418214	a
5	high	Control_2019	6684014761	30836135	174	6614295346	6753734175	a
6	low	Control_2019	659263279	30836135	174	6522913376	6662352204	b
8	low	Drought_2019	664935023	32207293	174	6576530677	6722169784	a
7	high	Drought_2019	6646532823	30836135	174	6576813409	6716252237	a
9	high	Control_Pre_drought_2020	6752868528	30836135	174	6683149114	6822587942	a
10	low	Control_Pre_drought_2020	6685277837	30836135	174	6615558423	6754997251	a
12	low	Drought_Pre_drought_2020	6813370431	32207293	174	6740550878	6886189984	a
11	high	Drought_Pre_drought_2020	6763992969	30836135	174	6694273555	6833712383	a
14	low	Control_2020	6808054689	30836135	174	6738335275	6877774104	a
13	high	Control_2020	6716084255	30836135	174	6646364841	678580367	b
16	low	Drought_2020	6840096923	30836135	174	6770377509	6909816337	a
15	high	Drought_2020	6807771691	30836135	174	6738052277	6877491105	a

## Sheet: 9_gene_enzymes_abundances
9-Enzyme abundances at phylum level
Number	function	Enzyme name	weather_treatment	Functional_Diversity	Phylum_mothur	avg_abund	Sum	sd	min_abund	max_abund	total_ASVs
1	EC:1.11.1.6	Catalase	Control	high	Actinobacteriota	7.14286	21.4286	0	7.14286	7.14286	3
2	EC:1.11.1.6	Catalase	Control	high	Bacteroidota	7.89357	134.191	2.70341	3.7037	14.2857	17
3	EC:1.11.1.6	Catalase	Control	high	Myxococcota	4.7619	4.7619	NA	4.7619	4.7619	1
4	EC:1.11.1.6	Catalase	Control	high	Proteobacteria	10.6253	371.885	5.20141	3.7037	25	35
5	EC:1.11.1.6	Catalase	Control	low	Actinobacteriota	7.69231	15.3846	0	7.69231	7.69231	2
6	EC:1.11.1.6	Catalase	Control	low	Bacteroidota	6.69911	100.487	1.30272	5	10	15
7	EC:1.11.1.6	Catalase	Control	low	Myxococcota	6.3816	31.908	1.00481	5	7.69231	5
8	EC:1.11.1.6	Catalase	Control	low	Proteobacteria	11.0487	353.557	4.47225	5	20	32
9	EC:1.11.1.6	Catalase	Drought	high	Actinobacteriota	7.1677	100.348	1.78533	5.26316	12.5	14
10	EC:1.11.1.6	Catalase	Drought	high	Bacteroidota	6.68193	86.8651	1.33073	5	10	13
11	EC:1.11.1.6	Catalase	Drought	high	Myxococcota	6.2963	18.8889	0.6415	5.55556	6.66667	3
12	EC:1.11.1.6	Catalase	Drought	high	Proteobacteria	12.8795	386.385	4.70781	5.26316	25	30
13	EC:1.11.1.6	Catalase	Drought	low	Actinobacteriota	6.33617	76.0341	1.19174	4.16667	8.33333	12
14	EC:1.11.1.6	Catalase	Drought	low	Bacteroidota	6.57993	98.699	1.48578	4.16667	9.09091	15
15	EC:1.11.1.6	Catalase	Drought	low	Myxococcota	5.26316	5.26316	NA	5.26316	5.26316	1
16	EC:1.11.1.6	Catalase	Drought	low	Proteobacteria	11.641	384.152	4.91273	4.16667	22.2222	33
17	EC:1.15.1.1	Superóxido dismutase	Control	high	Acidobacteriota	7.00173	280.069	1.95814	3.7037	12.5	40
18	EC:1.15.1.1	Superóxido dismutase	Control	high	Actinobacteriota	8.27922	33.1169	4.18735	4.54545	14.2857	4
19	EC:1.15.1.1	Superóxido dismutase	Control	high	Bacteroidota	23.6807	402.572	8.11023	11.1111	42.8571	17
20	EC:1.15.1.1	Superóxido dismutase	Control	high	Chloroflexi	6.77825	176.234	1.43403	3.7037	10	26
21	EC:1.15.1.1	Superóxido dismutase	Control	high	Cyanobacteria	14.2857	14.2857	NA	14.2857	14.2857	1
22	EC:1.15.1.1	Superóxido dismutase	Control	high	Myxococcota	9.52381	9.52381	NA	9.52381	9.52381	1
23	EC:1.15.1.1	Superóxido dismutase	Control	high	Proteobacteria	17.5352	754.014	11.9094	3.7037	50	43
24	EC:1.15.1.1	Superóxido dismutase	Control	high	Verrucomicrobiota	12.9211	77.5265	3.05972	7.40741	16.6667	6
25	EC:1.15.1.1	Superóxido dismutase	Control	low	Acidobacteriota	6.79734	251.502	1.2735	5	10	37
26	EC:1.15.1.1	Superóxido dismutase	Control	low	Actinobacteriota	8.80232	35.2093	4.45718	5.88235	15.3846	4
27	EC:1.15.1.1	Superóxido dismutase	Control	low	Bacteroidota	20.0973	301.46	3.90816	15	30	15
28	EC:1.15.1.1	Superóxido dismutase	Control	low	Chloroflexi	6.62168	132.434	1.2779	5	10	20
29	EC:1.15.1.1	Superóxido dismutase	Control	low	Myxococcota	12.7632	63.816	2.00961	10	15.3846	5
30	EC:1.15.1.1	Superóxido dismutase	Control	low	Proteobacteria	16.559	728.595	11.2906	5	40	44
31	EC:1.15.1.1	Superóxido dismutase	Control	low	Verrucomicrobiota	13.3341	146.675	2.85942	10	20	11
32	EC:1.15.1.1	Superóxido dismutase	Drought	high	Acidobacteriota	7.54232	286.608	2.37073	5	16.6667	38
33	EC:1.15.1.1	Superóxido dismutase	Drought	high	Actinobacteriota	9.69002	174.42	3.49885	5.26316	16.6667	18
34	EC:1.15.1.1	Superóxido dismutase	Drought	high	Bacteroidota	20.0458	260.595	3.99218	15	30	13
35	EC:1.15.1.1	Superóxido dismutase	Drought	high	Chloroflexi	7.18967	165.362	1.43546	5	11.1111	23
36	EC:1.15.1.1	Superóxido dismutase	Drought	high	Crenarchaeota	6.66667	6.66667	NA	6.66667	6.66667	1
37	EC:1.15.1.1	Superóxido dismutase	Drought	high	Myxococcota	12.5926	37.7778	1.283	11.1111	13.3333	3
38	EC:1.15.1.1	Superóxido dismutase	Drought	high	Proteobacteria	18.8717	754.867	11.7418	5.26316	50	40
39	EC:1.15.1.1	Superóxido dismutase	Drought	high	Verrucomicrobiota	12.6852	76.1111	0.872535	11.1111	13.3333	6
40	EC:1.15.1.1	Superóxido dismutase	Drought	low	Acidobacteriota	7.1983	215.949	1.94854	4.16667	11.1111	30
41	EC:1.15.1.1	Superóxido dismutase	Drought	low	Actinobacteriota	9.04643	108.557	3.80783	4.16667	15.3846	12
42	EC:1.15.1.1	Superóxido dismutase	Drought	low	Bacteroidota	19.7398	296.097	4.45733	12.5	27.2727	15
43	EC:1.15.1.1	Superóxido dismutase	Drought	low	Chloroflexi	6.99173	195.769	1.60285	4.16667	10	28
44	EC:1.15.1.1	Superóxido dismutase	Drought	low	Crenarchaeota	8.86905	35.4762	1.39342	7.14286	10	4
45	EC:1.15.1.1	Superóxido dismutase	Drought	low	Cyanobacteria	16.0256	32.0513	0.906547	15.3846	16.6667	2
46	EC:1.15.1.1	Superóxido dismutase	Drought	low	Myxococcota	10.5263	10.5263	NA	10.5263	10.5263	1
47	EC:1.15.1.1	Superóxido dismutase	Drought	low	Patescibacteria	5.26316	5.26316	NA	5.26316	5.26316	1
48	EC:1.15.1.1	Superóxido dismutase	Drought	low	Proteobacteria	19.9818	759.307	11.9896	4.16667	44.4444	38
49	EC:1.15.1.1	Superóxido dismutase	Drought	low	Verrucomicrobiota	11.1145	77.8016	2.08105	8.33333	14.2857	7
50	EC:1.8.1.7	Glutathione Reductase	Control	high	Cyanobacteria	7.14286	7.14286	NA	7.14286	7.14286	1
51	EC:1.8.1.7	Glutathione Reductase	Control	high	Proteobacteria	4.55247	13.6574	1.4701	3.7037	6.25	3
52	EC:1.8.1.7	Glutathione Reductase	Drought	high	Crenarchaeota	6.66667	6.66667	NA	6.66667	6.66667	1
53	EC:1.8.1.7	Glutathione Reductase	Drought	high	Proteobacteria	7.14286	7.14286	NA	7.14286	7.14286	1
54	EC:1.8.1.7	Glutathione Reductase	Drought	low	Crenarchaeota	8.86905	35.4762	1.39342	7.14286	10	4
55	EC:1.8.1.7	Glutathione Reductase	Drought	low	Cyanobacteria	8.01282	16.0256	0.453274	7.69231	8.33333	2
56	EC:1.9.3.1	Cytochrome-c oxidase	Control	high	Acidobacteriota	32.0953	1283.81	10.2074	14.8148	62.5	40
57	EC:1.9.3.1	Cytochrome-c oxidase	Control	high	Actinobacteriota	23.8095	71.4286	4.12393	21.4286	28.5714	3
58	EC:1.9.3.1	Cytochrome-c oxidase	Control	high	Bacteroidota	47.3614	805.145	16.2205	22.2222	85.7143	17
59	EC:1.9.3.1	Cytochrome-c oxidase	Control	high	Chloroflexi	18.3914	478.178	6.62037	4.54545	30	26
60	EC:1.9.3.1	Cytochrome-c oxidase	Control	high	Cyanobacteria	21.4286	21.4286	NA	21.4286	21.4286	1
61	EC:1.9.3.1	Cytochrome-c oxidase	Control	high	Myxococcota	38.0952	38.0952	NA	38.0952	38.0952	1
62	EC:1.9.3.1	Cytochrome-c oxidase	Control	high	Proteobacteria	30.1362	1295.85	9.29653	14.8148	62.5	43
63	EC:1.9.3.1	Cytochrome-c oxidase	Control	high	Verrucomicrobiota	25.8422	155.053	6.11944	14.8148	33.3333	6
64	EC:1.9.3.1	Cytochrome-c oxidase	Control	low	Acidobacteriota	31.8871	1179.82	7.41862	21.0526	50	37
65	EC:1.9.3.1	Cytochrome-c oxidase	Control	low	Actinobacteriota	22.5608	90.2432	5.95292	17.6471	30.7692	4
66	EC:1.9.3.1	Cytochrome-c oxidase	Control	low	Bacteroidota	40.1947	602.92	7.81633	30	60	15
67	EC:1.9.3.1	Cytochrome-c oxidase	Control	low	Chloroflexi	18.5958	371.916	5.53547	5	30	20
68	EC:1.9.3.1	Cytochrome-c oxidase	Control	low	Myxococcota	51.0528	255.264	8.03845	40	61.5385	5
69	EC:1.9.3.1	Cytochrome-c oxidase	Control	low	Proteobacteria	32.1074	1412.72	6.8495	20	50	44
70	EC:1.9.3.1	Cytochrome-c oxidase	Control	low	Verrucomicrobiota	26.6681	293.35	5.71885	20	40	11
71	EC:1.9.3.1	Cytochrome-c oxidase	Drought	high	Acidobacteriota	35.8981	1364.13	13.0857	20	83.3333	38
72	EC:1.9.3.1	Cytochrome-c oxidase	Drought	high	Actinobacteriota	25.2056	352.879	5.20284	18.75	37.5	14
73	EC:1.9.3.1	Cytochrome-c oxidase	Drought	high	Bacteroidota	40.0916	521.19	7.98435	30	60	13
74	EC:1.9.3.1	Cytochrome-c oxidase	Drought	high	Chloroflexi	21.569	496.087	4.30637	15	33.3333	23
75	EC:1.9.3.1	Cytochrome-c oxidase	Drought	high	Crenarchaeota	6.66667	6.66667	NA	6.66667	6.66667	1
76	EC:1.9.3.1	Cytochrome-c oxidase	Drought	high	Myxococcota	50.3704	151.111	5.132	44.4444	53.3333	3
77	EC:1.9.3.1	Cytochrome-c oxidase	Drought	high	Proteobacteria	33.129	1258.9	7.63838	22.2222	62.5	38
78	EC:1.9.3.1	Cytochrome-c oxidase	Drought	high	Verrucomicrobiota	25.3704	152.222	1.74507	22.2222	26.6667	6
79	EC:1.9.3.1	Cytochrome-c oxidase	Drought	low	Acidobacteriota	34.1133	1023.4	9.83117	16.6667	55.5556	30
80	EC:1.9.3.1	Cytochrome-c oxidase	Drought	low	Actinobacteriota	21.7188	260.625	5.38578	12.5	30.7692	12
81	EC:1.9.3.1	Cytochrome-c oxidase	Drought	low	Bacteroidota	39.4796	592.194	8.91466	25	54.5455	15
82	EC:1.9.3.1	Cytochrome-c oxidase	Drought	low	Chloroflexi	20.1086	563.041	6.18203	5.88235	30	28
83	EC:1.9.3.1	Cytochrome-c oxidase	Drought	low	Crenarchaeota	8.86905	35.4762	1.39342	7.14286	10	4
84	EC:1.9.3.1	Cytochrome-c oxidase	Drought	low	Cyanobacteria	24.0385	48.0769	1.35982	23.0769	25	2
85	EC:1.9.3.1	Cytochrome-c oxidase	Drought	low	Myxococcota	42.1053	42.1053	NA	42.1053	42.1053	1
86	EC:1.9.3.1	Cytochrome-c oxidase	Drought	low	Proteobacteria	32.9257	1251.18	9.32182	16.6667	55.5556	38
87	EC:1.9.3.1	Cytochrome-c oxidase	Drought	low	Verrucomicrobiota	22.229	155.603	4.16211	16.6667	28.5714	7
88	EC:2.5.1.18	Glutathione Transferase	Control	high	Actinobacteriota	4.54545	4.54545	NA	4.54545	4.54545	1
89	EC:2.5.1.18	Glutathione Transferase	Control	high	Cyanobacteria	50	50	NA	50	50	1
90	EC:2.5.1.18	Glutathione Transferase	Control	high	Myxococcota	33.3333	33.3333	NA	33.3333	33.3333	1
91	EC:2.5.1.18	Glutathione Transferase	Control	high	Proteobacteria	40.0408	1681.72	20.5975	3.7037	100	42
92	EC:2.5.1.18	Glutathione Transferase	Control	low	Myxococcota	44.6712	223.356	7.03365	35	53.8462	5
93	EC:2.5.1.18	Glutathione Transferase	Control	low	Proteobacteria	40.3462	1775.23	17.7569	15	80	44
94	EC:2.5.1.18	Glutathione Transferase	Drought	high	Actinobacteriota	6.875	27.5	0.991865	6.25	8.33333	4
95	EC:2.5.1.18	Glutathione Transferase	Drought	high	Myxococcota	44.0741	132.222	4.4905	38.8889	46.6667	3
96	EC:2.5.1.18	Glutathione Transferase	Drought	high	Proteobacteria	45.9278	1745.26	18.4881	15.7895	100	38
97	EC:2.5.1.18	Glutathione Transferase	Drought	low	Cyanobacteria	44.5513	89.1026	19.4908	30.7692	58.3333	2
98	EC:2.5.1.18	Glutathione Transferase	Drought	low	Myxococcota	36.8421	36.8421	NA	36.8421	36.8421	1
99	EC:2.5.1.18	Glutathione Transferase	Drought	low	Proteobacteria	44.1651	1678.27	20.4518	12.5	88.8889	38
100	EC:2.7.11.1	Serine Histidine Kinase	Control	high	Acidobacteriota	43.0664	1722.66	21.6266	11.1111	100	40
101	EC:2.7.11.1	Serine Histidine Kinase	Control	high	Actinobacteriota	44.9675	179.87	20.031	22.7273	71.4286	4
102	EC:2.7.11.1	Serine Histidine Kinase	Control	high	Bacteroidota	23.6807	402.572	8.11023	11.1111	42.8571	17
103	EC:2.7.11.1	Serine Histidine Kinase	Control	high	Chloroflexi	10.5449	274.168	5.99796	4.34783	25	26
104	EC:2.7.11.1	Serine Histidine Kinase	Control	high	Cyanobacteria	71.4286	71.4286	NA	71.4286	71.4286	1
105	EC:2.7.11.1	Serine Histidine Kinase	Control	high	Myxococcota	47.619	47.619	NA	47.619	47.619	1
106	EC:2.7.11.1	Serine Histidine Kinase	Control	high	Proteobacteria	14.7073	632.414	6.26304	3.7037	38.4615	43
107	EC:2.7.11.1	Serine Histidine Kinase	Control	high	Verrucomicrobiota	12.9211	77.5265	3.05972	7.40741	16.6667	6
108	EC:2.7.11.1	Serine Histidine Kinase	Control	low	Acidobacteriota	43.3071	1602.36	19.2381	15.7895	80	37
109	EC:2.7.11.1	Serine Histidine Kinase	Control	low	Actinobacteriota	35.6052	106.816	9.18151	29.4118	46.1538	3
110	EC:2.7.11.1	Serine Histidine Kinase	Control	low	Bacteroidota	20.0973	301.46	3.90816	15	30	15
111	EC:2.7.11.1	Serine Histidine Kinase	Control	low	Chloroflexi	11.2176	224.351	6.70971	5	23.0769	20
112	EC:2.7.11.1	Serine Histidine Kinase	Control	low	Myxococcota	60.5392	242.157	7.93956	50	66.6667	4
113	EC:2.7.11.1	Serine Histidine Kinase	Control	low	Proteobacteria	16.6516	732.67	7.38672	10	53.8462	44
114	EC:2.7.11.1	Serine Histidine Kinase	Control	low	Thermoplasmatota	18.75	18.75	NA	18.75	18.75	1
115	EC:2.7.11.1	Serine Histidine Kinase	Control	low	Verrucomicrobiota	13.3341	146.675	2.85942	10	20	11
116	EC:2.7.11.1	Serine Histidine Kinase	Drought	high	Acidobacteriota	49.8755	1895.27	25.2401	15	116.667	38
117	EC:2.7.11.1	Serine Histidine Kinase	Drought	high	Actinobacteriota	50.6853	810.965	14.8578	31.25	75	16
118	EC:2.7.11.1	Serine Histidine Kinase	Drought	high	Bacteroidota	20.0458	260.595	3.99218	15	30	13
119	EC:2.7.11.1	Serine Histidine Kinase	Drought	high	Chloroflexi	15.0731	346.682	7.7061	6.25	33.3333	23
120	EC:2.7.11.1	Serine Histidine Kinase	Drought	high	Crenarchaeota	20	20	NA	20	20	1
121	EC:2.7.11.1	Serine Histidine Kinase	Drought	high	Myxococcota	62.963	188.889	6.415	55.5556	66.6667	3
122	EC:2.7.11.1	Serine Histidine Kinase	Drought	high	Proteobacteria	15.961	638.439	4.53471	10.5263	28.5714	40
123	EC:2.7.11.1	Serine Histidine Kinase	Drought	high	Verrucomicrobiota	12.6852	76.1111	0.872535	11.1111	13.3333	6
124	EC:2.7.11.1	Serine Histidine Kinase	Drought	low	Acidobacteriota	48.1952	1445.86	21.1857	12.5	88.8889	30
125	EC:2.7.11.1	Serine Histidine Kinase	Drought	low	Actinobacteriota	48.8581	586.297	16.5221	25	76.9231	12
126	EC:2.7.11.1	Serine Histidine Kinase	Drought	low	Bacteroidota	19.7398	296.097	4.45733	12.5	27.2727	15
127	EC:2.7.11.1	Serine Histidine Kinase	Drought	low	Chloroflexi	13.1165	367.261	7.94862	4.16667	30	28
128	EC:2.7.11.1	Serine Histidine Kinase	Drought	low	Crenarchaeota	26.6071	106.429	4.18025	21.4286	30	4
129	EC:2.7.11.1	Serine Histidine Kinase	Drought	low	Patescibacteria	5.26316	5.26316	NA	5.26316	5.26316	1
130	EC:2.7.11.1	Serine Histidine Kinase	Drought	low	Proteobacteria	16.6659	633.304	7.50503	8.33333	45.4545	38
131	EC:2.7.11.1	Serine Histidine Kinase	Drought	low	Verrucomicrobiota	11.1145	77.8016	2.08105	8.33333	14.2857	7
132	EC:2.7.13.3	Histidine Kinase	Control	high	Acidobacteriota	39.1308	1565.23	12.2144	18.5185	70	40
133	EC:2.7.13.3	Histidine Kinase	Control	high	Actinobacteriota	55.6818	222.727	22.9787	22.7273	71.4286	4
134	EC:2.7.13.3	Histidine Kinase	Control	high	Bacteroidota	31.5743	536.763	10.8136	14.8148	57.1429	17
135	EC:2.7.13.3	Histidine Kinase	Control	high	Chloroflexi	24.0414	625.078	7.65386	13.0435	50	26
136	EC:2.7.13.3	Histidine Kinase	Control	high	Cyanobacteria	57.1429	57.1429	NA	57.1429	57.1429	1
137	EC:2.7.13.3	Histidine Kinase	Control	high	Myxococcota	47.619	47.619	NA	47.619	47.619	1
138	EC:2.7.13.3	Histidine Kinase	Control	high	Proteobacteria	59.8484	2154.54	13.9465	37.037	83.3333	36
139	EC:2.7.13.3	Histidine Kinase	Control	high	Verrucomicrobiota	19.3816	116.29	4.58958	11.1111	25	6
140	EC:2.7.13.3	Histidine Kinase	Control	low	Acidobacteriota	38.186	1412.88	8.33581	25	58.3333	37
141	EC:2.7.13.3	Histidine Kinase	Control	low	Actinobacteriota	55.847	223.388	16.7148	41.1765	76.9231	4
142	EC:2.7.13.3	Histidine Kinase	Control	low	Bacteroidota	26.7965	401.947	5.21089	20	40	15
143	EC:2.7.13.3	Histidine Kinase	Control	low	Chloroflexi	25.4896	509.792	9.76059	15	46.1538	20
144	EC:2.7.13.3	Histidine Kinase	Control	low	Myxococcota	60.5392	242.157	7.93956	50	66.6667	4
145	EC:2.7.13.3	Histidine Kinase	Control	low	Proteobacteria	67.1416	2685.67	14.1471	50	100	40
146	EC:2.7.13.3	Histidine Kinase	Control	low	Verrucomicrobiota	20.0011	220.012	4.28914	15	30	11
147	EC:2.7.13.3	Histidine Kinase	Drought	high	Acidobacteriota	41.3387	1570.87	11.3889	26.3158	83.3333	38
148	EC:2.7.13.3	Histidine Kinase	Drought	high	Actinobacteriota	52.4578	786.867	14.4095	31.25	71.4286	15
149	EC:2.7.13.3	Histidine Kinase	Drought	high	Bacteroidota	26.7277	347.46	5.3229	20	40	13
150	EC:2.7.13.3	Histidine Kinase	Drought	high	Chloroflexi	33.3942	768.067	12.32	18.75	66.6667	23
151	EC:2.7.13.3	Histidine Kinase	Drought	high	Myxococcota	62.963	188.889	6.415	55.5556	66.6667	3
152	EC:2.7.13.3	Histidine Kinase	Drought	high	Proteobacteria	66.5376	2195.74	8.15316	52.6316	83.3333	33
153	EC:2.7.13.3	Histidine Kinase	Drought	high	Verrucomicrobiota	19.0278	114.167	1.3088	16.6667	20	6
154	EC:2.7.13.3	Histidine Kinase	Drought	low	Acidobacteriota	39.748	1192.44	12.6181	20.8333	77.7778	30
155	EC:2.7.13.3	Histidine Kinase	Drought	low	Actinobacteriota	54.798	657.575	16.7633	25	83.3333	12
156	EC:2.7.13.3	Histidine Kinase	Drought	low	Bacteroidota	26.3197	394.796	5.9431	16.6667	36.3636	15
157	EC:2.7.13.3	Histidine Kinase	Drought	low	Chloroflexi	29.2957	820.28	13.0537	12.5	60	28
158	EC:2.7.13.3	Histidine Kinase	Drought	low	Cyanobacteria	67.9487	135.897	1.81309	66.6667	69.2308	2
159	EC:2.7.13.3	Histidine Kinase	Drought	low	Patescibacteria	21.0526	21.0526	NA	21.0526	21.0526	1
160	EC:2.7.13.3	Histidine Kinase	Drought	low	Proteobacteria	66.9007	2140.82	16.9354	41.6667	111.111	32
161	EC:2.7.13.3	Histidine Kinase	Drought	low	Verrucomicrobiota	16.6718	116.702	3.12158	12.5	21.4286	7
162	EC:5.2.1.8	Isomerase Peptidylpropyl isomerase	Control	high	Acidobacteriota	34.4405	1377.62	9.82833	18.5185	62.5	40
163	EC:5.2.1.8	Isomerase Peptidylpropyl isomerase	Control	high	Actinobacteriota	27.2727	109.091	12.5802	9.09091	35.7143	4
164	EC:5.2.1.8	Isomerase Peptidylpropyl isomerase	Control	high	Bacteroidota	63.1486	1073.53	21.6273	29.6296	114.286	17
165	EC:5.2.1.8	Isomerase Peptidylpropyl isomerase	Control	high	Chloroflexi	15.4398	401.436	3.87864	8.69565	25	26
166	EC:5.2.1.8	Isomerase Peptidylpropyl isomerase	Control	high	Cyanobacteria	28.5714	28.5714	NA	28.5714	28.5714	1
167	EC:5.2.1.8	Isomerase Peptidylpropyl isomerase	Control	high	Myxococcota	38.0952	38.0952	NA	38.0952	38.0952	1
168	EC:5.2.1.8	Isomerase Peptidylpropyl isomerase	Control	high	Proteobacteria	51.9715	2130.83	17.1315	22.2222	83.3333	41
169	EC:5.2.1.8	Isomerase Peptidylpropyl isomerase	Control	high	Verrucomicrobiota	32.3027	193.816	7.6493	18.5185	41.6667	6
170	EC:5.2.1.8	Isomerase Peptidylpropyl isomerase	Control	low	Acidobacteriota	33.9867	1257.51	6.3675	25	50	37
171	EC:5.2.1.8	Isomerase Peptidylpropyl isomerase	Control	low	Actinobacteriota	29.44	117.76	6.7775	23.5294	38.4615	4
172	EC:5.2.1.8	Isomerase Peptidylpropyl isomerase	Control	low	Bacteroidota	53.5929	803.894	10.4218	40	80	15
173	EC:5.2.1.8	Isomerase Peptidylpropyl isomerase	Control	low	Chloroflexi	15.5413	310.826	4.23806	10	23.0769	20
174	EC:5.2.1.8	Isomerase Peptidylpropyl isomerase	Control	low	Myxococcota	51.0528	255.264	8.03845	40	61.5385	5
175	EC:5.2.1.8	Isomerase Peptidylpropyl isomerase	Control	low	Proteobacteria	58.8271	2588.39	16.038	35	100	44
176	EC:5.2.1.8	Isomerase Peptidylpropyl isomerase	Control	low	Thermoplasmatota	6.25	6.25	NA	6.25	6.25	1
177	EC:5.2.1.8	Isomerase Peptidylpropyl isomerase	Control	low	Verrucomicrobiota	33.3352	366.687	7.14856	25	50	11
178	EC:5.2.1.8	Isomerase Peptidylpropyl isomerase	Drought	high	Acidobacteriota	37.7116	1433.04	11.8536	25	83.3333	38
179	EC:5.2.1.8	Isomerase Peptidylpropyl isomerase	Drought	high	Actinobacteriota	28.3426	510.166	12.1013	12.5	62.5	18
180	EC:5.2.1.8	Isomerase Peptidylpropyl isomerase	Drought	high	Bacteroidota	53.4554	694.921	10.6458	40	80	13
181	EC:5.2.1.8	Isomerase Peptidylpropyl isomerase	Drought	high	Chloroflexi	18.3211	421.385	4.89824	12.5	33.3333	23
182	EC:5.2.1.8	Isomerase Peptidylpropyl isomerase	Drought	high	Crenarchaeota	13.3333	13.3333	NA	13.3333	13.3333	1
183	EC:5.2.1.8	Isomerase Peptidylpropyl isomerase	Drought	high	Myxococcota	50.3704	151.111	5.132	44.4444	53.3333	3
184	EC:5.2.1.8	Isomerase Peptidylpropyl isomerase	Drought	high	Proteobacteria	62.8714	2514.86	16.8118	38.8889	125	40
185	EC:5.2.1.8	Isomerase Peptidylpropyl isomerase	Drought	high	Verrucomicrobiota	31.713	190.278	2.18134	27.7778	33.3333	6
186	EC:5.2.1.8	Isomerase Peptidylpropyl isomerase	Drought	low	Acidobacteriota	35.9915	1079.75	9.74271	20.8333	55.5556	30
187	EC:5.2.1.8	Isomerase Peptidylpropyl isomerase	Drought	low	Actinobacteriota	28.9706	347.647	6.25701	20.8333	41.6667	12
188	EC:5.2.1.8	Isomerase Peptidylpropyl isomerase	Drought	low	Bacteroidota	52.6395	789.592	11.8862	33.3333	72.7273	15
189	EC:5.2.1.8	Isomerase Peptidylpropyl isomerase	Drought	low	Chloroflexi	17.0458	477.283	5.42591	8.33333	30	28
190	EC:5.2.1.8	Isomerase Peptidylpropyl isomerase	Drought	low	Crenarchaeota	17.7381	70.9524	2.78683	14.2857	20	4
191	EC:5.2.1.8	Isomerase Peptidylpropyl isomerase	Drought	low	Cyanobacteria	32.0513	64.1026	1.81309	30.7692	33.3333	2
192	EC:5.2.1.8	Isomerase Peptidylpropyl isomerase	Drought	low	Myxococcota	42.1053	42.1053	NA	42.1053	42.1053	1
193	EC:5.2.1.8	Isomerase Peptidylpropyl isomerase	Drought	low	Patescibacteria	10.5263	10.5263	NA	10.5263	10.5263	1
194	EC:5.2.1.8	Isomerase Peptidylpropyl isomerase	Drought	low	Proteobacteria	60.8156	2310.99	20.4166	29.1667	111.111	38
195	EC:5.2.1.8	Isomerase Peptidylpropyl isomerase	Drought	low	Verrucomicrobiota	27.7863	194.504	5.20263	20.8333	35.7143	7
